1 Assessing early detection ability through spatial  
2 arrangements in environmental surveillance for poliovirus: a  
3 simulation-based study

4

5 Toshiaki R. Asakura<sup>1,2,3\*</sup>, Kathleen M. O'Reilly<sup>1,2</sup>

6

7 <sup>1</sup> Department of Infectious Disease Epidemiology and Dynamics, London School of Hygiene &  
8 Tropical Medicine, London, UK.

9 <sup>2</sup> Centre for Mathematical Modelling of Infectious Diseases, London School of Hygiene & Tropical  
10 Medicine, London, UK

11 <sup>3</sup> School of Tropical Medicine and Global Health, Nagasaki University, Nagasaki, Japan

12

13 \* Corresponding to [toshiaki.asakura1@lshtm.ac.uk](mailto:toshiaki.asakura1@lshtm.ac.uk)

14

15

16

17

18

19

20

21

22

NOTE: This preprint reports new research that has not been certified by peer review and should not be used to guide clinical practice.

## 23 **Abstract**

24 Detecting the circulation of poliovirus in its early stages is paramount for swift public health action.  
25 Environmental surveillance (ES) is the testing of sewage samples for the presence of poliovirus and  
26 has the potential to enhance early detection capabilities. However, the establishment and  
27 maintenance of ES sites incur costs and necessitate human resources, underscoring the  
28 consideration of ES scale and site selection. Here, we aim to assess the early detection ability of ES  
29 by varying the number and location of ES sites using the simulation-based approach. We developed  
30 a stochastic meta-population model among unimmunised children aged under 5 years old and used  
31 geographic and demographic characteristics of South Africa as a case study of a non-endemic  
32 country, assuming a single introduction of wild poliovirus serotype 1. We constructed six scenarios  
33 by combining three importation risk distributions (predicated on population size, approximations of  
34 international inbound travel volume and border crossing volume) with two ES site layout strategies:  
35 one proportionate to population size and another focusing on importation risk via land border  
36 crossings. We showed that a modest number of strategically positioned ES sites can achieve a high  
37 early detection ability when assumed importation risks were geographically confined. In contrast,  
38 when importation risks were dispersed, the effectiveness of ES was diminished. Our sensitivity  
39 analyses suggested that the strategy to implement ES across large areas with low sampling  
40 frequency consistently resulted in a better early detection ability against various importation  
41 scenarios than one to implement ES in limited areas with high sampling frequency. Although we  
42 acknowledge the challenges of translating our simulated outcomes for real-world situations, our  
43 study has implications for deciding the scale and site selection of ES.

44 (276 words)

45

## 46 **Author summary**

47 Poliovirus causes paralytic poliomyelitis, a terrible and debilitating disease. Only a small number of  
48 infections with poliovirus result in disease. Early detection of these infections can inform public  
49 health decision-makers to trigger interventions such as vaccination campaigns. Environmental  
50 surveillance (ES) is able to detect poliovirus circulation by capturing virus shedding (even from  
51 asymptomatic people) in wastewater. Strategic geographical placements of ES sites may enhance  
52 early detection capabilities, but there has been limited exploration of factors that might affect early  
53 detection. Here, we investigated the relationship between the scale and site selection of ES and  
54 early detection ability by simulating the introduction, spread and detection of poliovirus among  
55 unimmunised children aged under 5 years old. We used geographic and demographic  
56 characteristics of South Africa as a case study of a non-endemic country, assuming an introduction  
57 of wild poliovirus serotype 1. We found that the informed ES placement achieved a high early  
58 detection ability when importation risks were geographically limited. In contrast, when importation  
59 risks were dispersed, the ES effectiveness was diminished. Our sensitivity results suggested the  
60 strategy to expand ES sites was robust against various importation scenarios and better than the  
61 strategy to merely increase sampling frequency in limited locations.

62 (199 words)

63 **Keywords:** polio, meta-population model, eradication, non-endemic, environment surveillance,  
64 wastewater surveillance, early detection

65 **Short title:** Early detection ability of environmental surveillance for poliovirus

66

67

## 68 Introduction

69 Global concerted efforts toward polio eradication have achieved a drastic reduction in the number of  
70 poliomyelitis cases [1] and cooperated surveillance systems contributed to this achievement [2].

71 Patients with paralytic poliomyelitis are detected through syndromic surveillance, referred to as  
72 acute flaccid paralysis (AFP) surveillance, but a tiny portion of infections can be detected due to a  
73 very low paralysis-to-infection rate. It has been estimated that for every 200 wild poliovirus serotype  
74 1 (WPV1) infections there will be one paralytic case [3]. To improve surveillance to rule out local  
75 transmission of poliovirus, sewage sampling, which is referred to as environmental surveillance  
76 (ES), has been developed. After the withdrawal of the trivalent oral polio vaccine (OPV) in 2016 and  
77 the emergence of vaccine-derived poliovirus serotype 2 (VDPV2) outbreaks [4,5], ES has been a  
78 vital complementary surveillance tool for polio eradication [6–8], especially for the detection of  
79 cryptic circulation in subnational areas of endemic countries, and detection of importation or  
80 confirmation of polio-free status in non-endemic countries.

81 Detection of poliovirus circulation through ES can trigger swift public health actions to contain  
82 outbreaks [9]. Recent examples include the detection of VDPV2 circulation first through the ES in  
83 the US [10,11] and the UK [12], which enabled public health authorities to conduct active case  
84 finding, supplementary immunisation activity and social mobilisations. On the other hand, delays in  
85 detection have been linked to a large number of cases during outbreaks [13]. The long reporting  
86 delays of AFP surveillance have been attributable to a delay in sample collection, transport, culture  
87 and sequencing as well as the time required to ship collected samples to other countries due to the  
88 lack of facilities in resource-limited settings [13,14].

89 Expanding ES sites can enhance early detection capabilities, but the establishment and  
90 maintenance of ES sites incur costs and necessitate human resources [15]. To operate ES  
91 effectively, the quality assessment is essential, which comprises the appropriateness of sampling  
92 site locations [16], importation risk assessment [17], ES-covered population size, non-enterovirus  
93 detection [18], and the quality of sample handling and sample processing. Although guidelines for

94 the implementation of ES have been developed by the Global Polio Eradication Initiative (GPEI)  
95 [19], specific guidance on the number and location of ES sites is still lacking due to uncertainties in  
96 available resources.

97 Quantitative evidence of the early detection ability of ES is needed to design ES layout strategies at  
98 the national or subnational level. One study empirically investigated the early detection capabilities  
99 using poliovirus genome data in Pakistan, showing that ES can detect the circulation of specific  
100 genotypic clusters before AFP surveillance in nearly 60% of sampled clusters [20]. From the  
101 perspective of a mathematical modelling approach, one seminal paper quantified the simulated  
102 cumulative probability of detecting poliovirus circulation through each AFP surveillance and ES [21],  
103 and one paper broadly examined the lead time of the first detection through ES over other  
104 surveillance systems assuming various pathogen characteristics [22]. Another study theoretically  
105 investigated optimal sampling frequency against emerging pathogens, considering a balance  
106 between sampling costs and disease burden [23].

107 There remains a gap in understanding the quantitative relationship between the ES early detection  
108 ability and spatial arrangements of ES sites. While laboratory facilities may be constrained by  
109 capacity, there is flexibility in the selection of ES sites and we aim to address this point using a  
110 simulational approach. Here, we utilised geographic and demographic characteristics of South  
111 Africa (where a polio-free status has been maintained since 1989 [24]) as a case study of a non-  
112 endemic country. We employed the stochastic meta-population framework (following the basic  
113 model structure proposed by Ranta et al. [21]) among unimmunised children aged under 5 years old  
114 to assess the first detection timing through AFP surveillance and ES. We assumed that a single  
115 patient with WPV1 was imported to a specific 'patch' (a unit of a spatial grid in the meta-population  
116 framework) according to the importation risk distribution. Our study setting was motivated by the  
117 WPV1 importation event of 2022 into Mozambique, a neighbouring country to South Africa, implying  
118 a non-negligible risk of WPV1 importation into South Africa [25].

119 By conducting simulations, we aim to explore the quantitative relationship between the number and  
120 location of ES sites and the early detection capabilities of ES over AFP surveillance.

## 121 **Results**

### 122 **Study setting.**

123 The overview of our study setting is summarised in Fig 1 and a schematic representation of our  
124 model is shown (Fig S3 in S1 text). We refer to a patch as a unit square at 20km spatial resolution  
125 (i.e. 400 km<sup>2</sup>), matched with the actual geographical location within the meta-population framework.  
126 The ES site was assumed to be placed within a single patch, covering 25% of the population of that  
127 patch. We chose 25% for a patch-level ES population coverage by considering the observed  
128 national ES population coverage and district-level ES population coverage (Table S4-5 and Fig S8  
129 in S1 text). Our SEIR model is comprised of three components: transmission model, AFP  
130 surveillance model and ES surveillance model (Fig S3 in S1 text). We assumed the probability of  
131 detecting poliovirus circulation through ES was proportional to the incidence rate of infected  
132 individuals. We define 'LT' as the lead time of the first detection (in days) through the ES over AFP  
133 surveillance and seven detection patterns were considered: 'No detection', 'AFP only detection',  
134 earlier detection through AFP surveillance than ES (i.e. '<-60 LT', '-60 ~ -1 LT'), earlier detection  
135 through ES than AFP surveillance (i.e. '0 ~ 59 LT', '≥60 LT') and 'ES only detection' (Fig 1B&C). We  
136 used the proportion of each detection pattern among simulations with poliovirus detections (i.e.  
137 excluding the 'no detection' pattern) as the main output of simulation results.

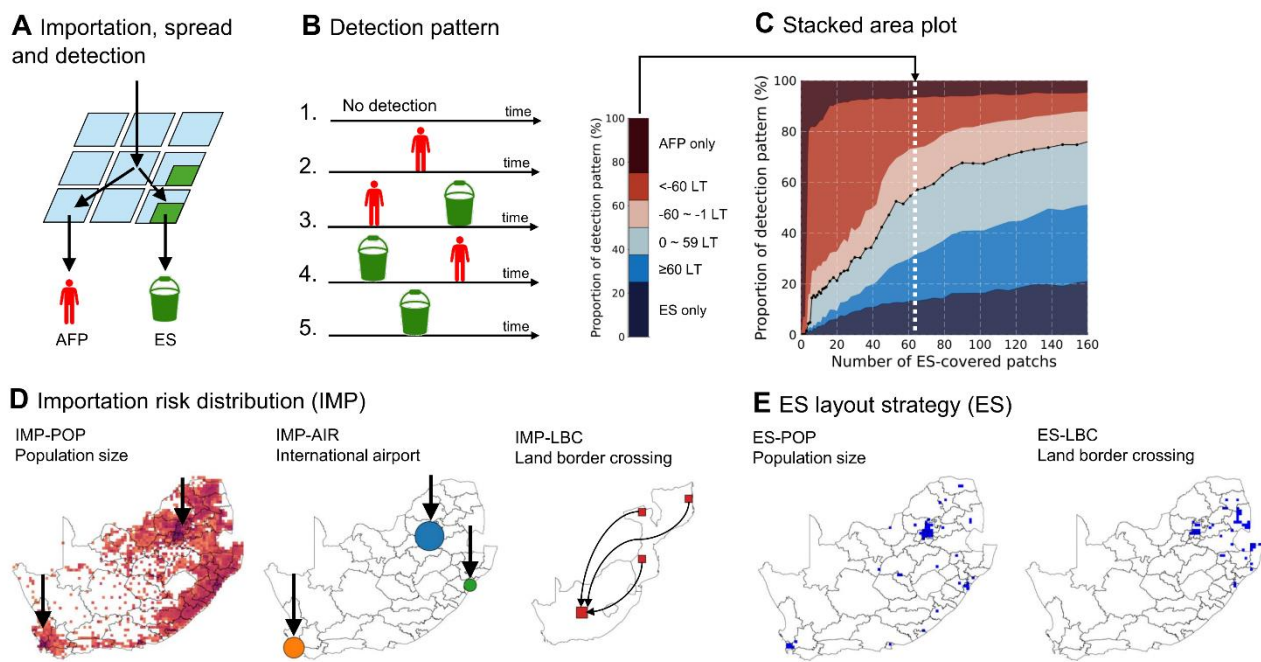

138

139 **Fig 1. Schematic illustration of study settings. (A)** Simulated importation of wild poliovirus  
 140 serotype 1 to South Africa, spread described by the meta-population model, and detection through  
 141 acute flaccid surveillance (AFP) and environmental surveillance (ES). AFP surveillance is carried  
 142 out across all patches whereas ES operations are confined to selected patches (in green). A patch-  
 143 level ES population coverage is assumed to be 25%. **(B)** Five detection patterns: i) No detection, ii)  
 144 AFP only detection, iii) earlier detection through AFP surveillance than ES, iv) earlier detection  
 145 through ES than AFP surveillance v) ES only detection. Detection patterns of iii) and iv) are further  
 146 classified based on the lead time (LT) of the first detection through ES over AFP surveillance. **(C)**  
 147 Stacked area plot of the proportion of each detection pattern against the number of ES-covered  
 148 patches. **(D)** Three importation risk distributions: i) IMP-POP corresponds to the 'Population size'-  
 149 based importation risk distribution and assumes importation risk is proportional to the population  
 150 size of each patch (indicated by orange-red colouration); ii) IMP-AIR corresponds to the  
 151 'International airport'-based importation risk distribution and assumes an importation risk is shaped  
 152 by international inbound travel volume in 2019 and approximated movement from airports. Each  
 153 circle denotes the international airport with a size proportional to the international inbound travel  
 154 volume: Blue, O.R. Tambo International Airport; Orange, Cape Town International Airport; Green,

155 King Shaka International Airport; iii) IMP-LBC corresponds to 'Land border crossing'-based  
156 importation risk distribution and assumes importation risk is proportional to human mobilisation from  
157 outbreak countries, in this study Mozambique. **(E)** Two ES site layout strategies: i) ES-POP denotes  
158 'Population size' where allocation of sites is ordered by population size in each patch; ii) ES-LBC  
159 denotes 'Land border crossing importation risk' where ES sites are placed according to assumed  
160 international travel volume via land border crossings.

161

162 Preliminary analysis illustrated that the first detection timing through ES was largely influenced by  
163 the assumed route of poliovirus introduction, and ES site layout. Therefore we prepared three  
164 importation risk distributions and two ES site layout strategies, totalling 6 scenarios when combined  
165 (Fig 1D&E, S7 in S1 text and S1-2 Video). For example, IMP-POP denotes the population size-  
166 based importation risk distribution and assumes that an importation risk is proportional to the  
167 population size of each patch (Fig 1D and S7A in S1 text). The ES site layout strategy determines  
168 the sequence in which patches are covered by the ES. For example, ES-LBC denotes land border  
169 crossing importation risk-based ES site layout strategy and assumes that we first cover patches with  
170 a high importation risk via land border crossing from Mozambique (Fig 1E, S8C in S1 text and S2  
171 Video). Six scenarios are expressed with the combinations of importation risk distribution and ES  
172 layout strategy as the following: IMP-POP/ES-POP, IMP-AIR/ES-POP, IMP-LBC/ES-POP, IMP-  
173 POP/ES-LBC, IMP-AIR/ES-LBC, and IMP-LBC/ES-LBC.

174

175 **A modest number of targeted ES site implementations can achieve high**  
176 **simulated early detection probability.**

177 The proportion of each detection pattern was visualised as the stacked area plot against the number  
178 of ES-covered patches for 6 scenarios (Fig 2). We truncated the number of ES-covered patches at  
179 160 sites even though the total number of patches for all of South Africa was 1502. The full scale of



180 the figure can be found in Fig S12 in S1 text, in which the x-axis represents the national ES  
 181 population coverage. When importation risks were concentrated in confined patches (e.g. IMP-AIR  
 182 and IMP-LBC) and an ES site layout strategy was prioritised to cover those high importation risk  
 183 areas (e.g. IMP-AIR/ES-POP and IMP-LBC/ES-LBC, shown in Fig 2B and 2F), 6–8 ES-covered  
 184 patches were sufficient to achieve 50% simulated early detection probability. In comparison, in the  
 185 scenario where the ES site layout strategy failed to prioritise patches with high importation risks  
 186 (e.g. IMP-LBC/ES-POP and IMP-AIR/ES-LBC, shown in Fig 2C and 2E), covering only 10 to 20  
 187 patches by ES resulted in low simulated early detection probability.

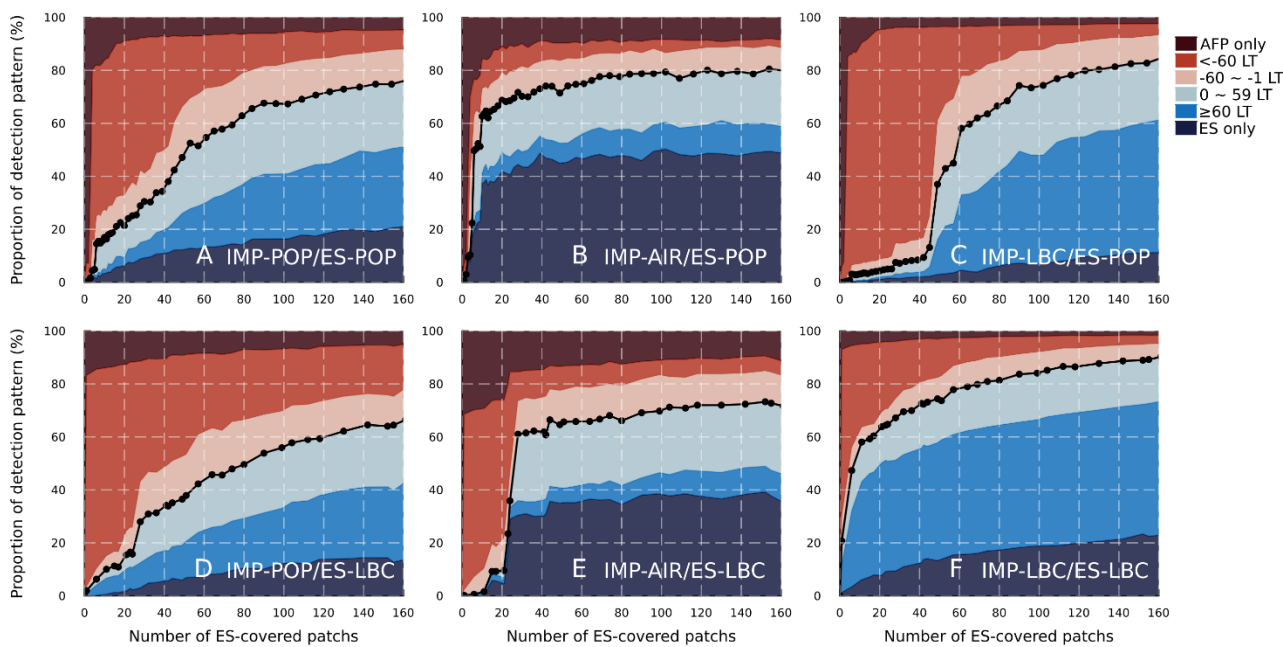

188

189 **Fig 2. Proportion of each detection pattern (%) against the number of ES-covered patches for**  
 190 **6 scenarios.** The blue-coloured area under the black dotted lines represents the simulated early  
 191 detection probability, consisting of the early detection through ES over AFP surveillance and the ES  
 192 only detection pattern. It is noted that the maximum number of ES-covered patches is 1502 and the  
 193 x-axis is truncated at 160. IMP-POP, 'Population size'-based importation risk distribution; IMP-AIR,  
 194 'International airport'-based importation risk distribution; IMP-LBC, 'Land border crossing'-based  
 195 importation risk distribution; ES-POP, 'Population size'-based ES site layout strategy; ES-LBC,  
 196 'Land border crossing importation risk'-based ES site layout strategy. LT denotes the lead time of  
 197 the first poliovirus detection through ES over AFP surveillance.

198

199 According to the wastewater plant data provided by the National Institute of Communicable Disease  
200 in South Africa on 27 November 2023, ES for poliovirus was operating at 17 wastewater plants,  
201 covering ~11.3% of the national population (if the wastewater-served population was imputed with  
202 the median value for two wastewater plants; see S1 text for details). Under our model assumptions,  
203 the closest number of ES-covered patches to match the current ES capacity in South Africa (i.e. the  
204 number of ES-covered patches required to achieve 11.3% national ES population coverage) was 58  
205 for ES-POP and 154 for ES-LBC. To investigate the impact of the exclusion of the ‘no detection  
206 pattern’ on the proportion of detection patterns, we visualised those proportions including the ‘no  
207 detection’ pattern in Fig S13 in S1 text. We found significant differences in the simulated probability  
208 of at least one detection of poliovirus either through ES or AFP surveillance (coloured areas), which  
209 would be attributable to heterogeneity in the effective immunisation proportions.

210 **Sensitivity analysis showed sampling frequency and ES sensitivity were key**  
211 **parameters for enhancing early detection ability.**

212 We conducted a sensitivity analysis of the basic reproduction number ( $R_0$ ), travelling rate between  
213 patches ( $\alpha$ ), sampling frequency, ES sensitivity, and patch-level ES population coverage ( $p_c$ ) for the  
214 IMP-POP/ES-POP scenario (Fig 3 and 4). The basic reproduction number of poliovirus ( $R_0$ ) did not  
215 influence the simulated early detection probability in the entire region of the number of ES-covered  
216 patches, whereas a lower basic reproduction number resulted in a large proportion of AFP only or  
217 ES only detection patterns. This tendency was consistent with the sensitivity analysis under the  
218 single patch setting (Fig S10 in S1 text).

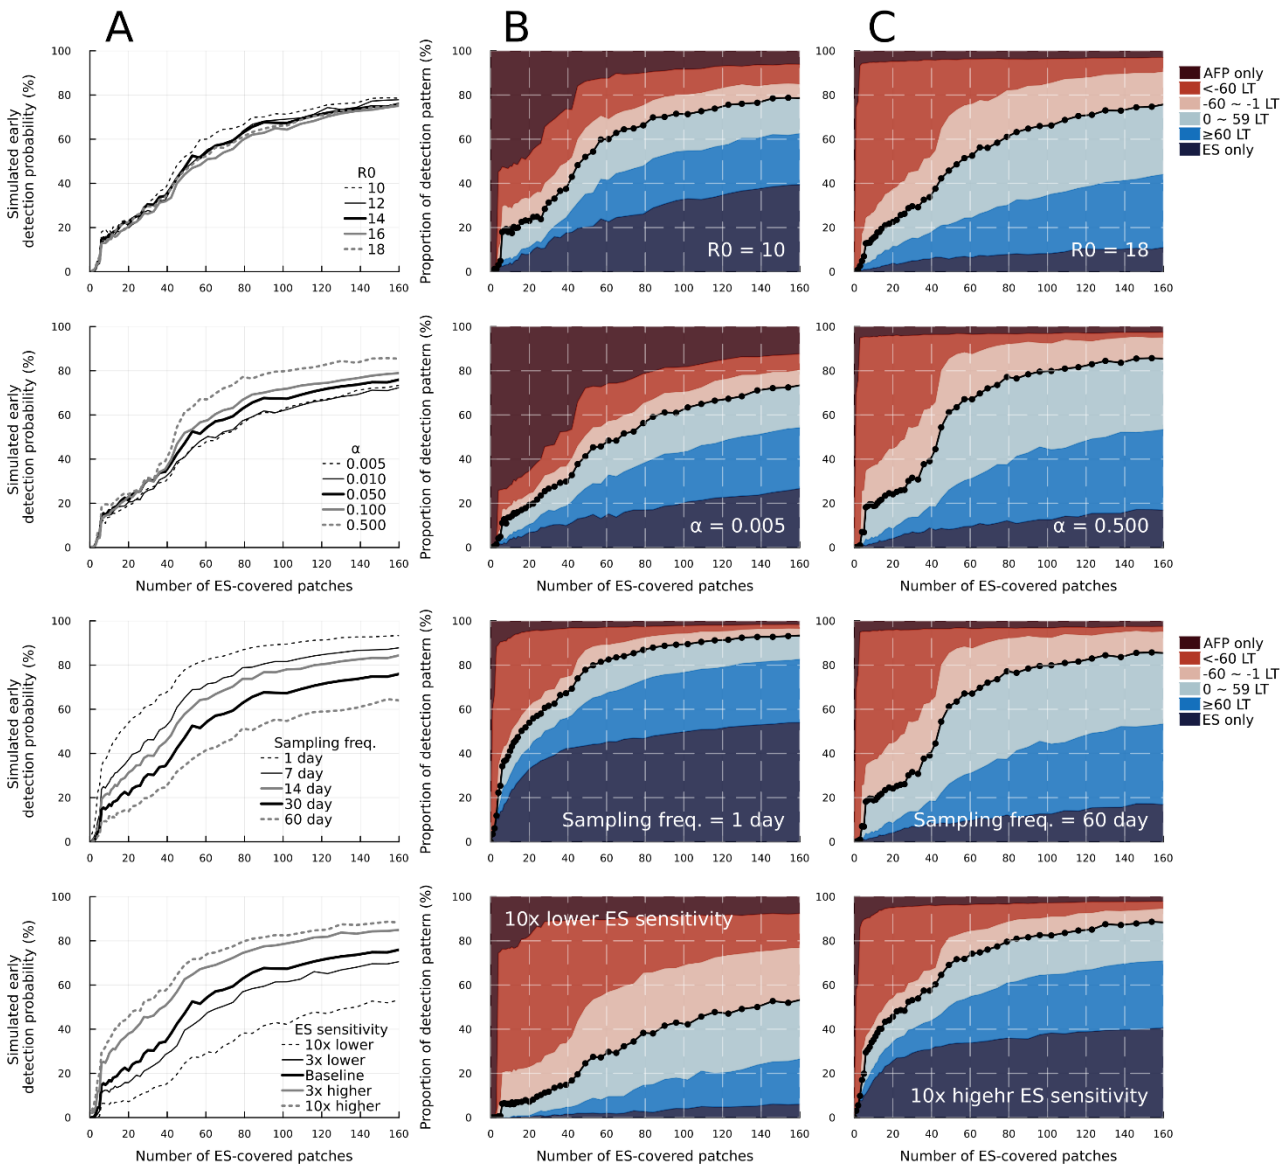

219

220 **Fig 3. Sensitivity analysis of the basic reproduction number ( $R_0$ ), travelling rate between**  
 221 **patches ( $\alpha$ ), sampling frequency and ES sensitivity for the IMP-POP/ES-POP scenario. (A)**

222 Simulated early detection probability for different parameters against the number of ES-covered  
 223 patches. Thick black lines represent results with the same parameter value as in the main analysis.

224 (B, C) Stacked area plot for the smallest and largest sensitivity parameter values. LT corresponds to  
 225 the lead time of the first poliovirus detection through ES over AFP surveillance and 'sampling freq.'  
 226 corresponds to the sampling frequency.

227

228 The simulated early detection probability remained consistent across different travelling rates ( $\alpha$ ) for  
229 a small number of ES-covered patches (i.e. up to 40 patches) whereas increasing the value of  $\alpha$  by  
230 tenfold, from the baseline value of 0.050 to 0.500, yielded a 15% increase in simulated early  
231 detection probability after the number of ES-covered patches exceeded 50. Notable disparities were  
232 consistently observed when focusing on the proportion of AFP only or ES only detection patterns.  
233 Setting high travelling rates resulted in smaller proportions of ES only detection patterns whereas  
234 setting low travelling rates resulted in higher proportions.

235 Both sampling frequency and ES sensitivity (which is governed by two parameters of lognormal  
236 distribution) influenced the simulated early detection probability in the order of 10 to 25%, and these  
237 differences were consistently observed across the entire region of the number of ES-covered  
238 patches. It is noted that either with the higher sampling frequency or higher ES sensitivity, ES only  
239 detection pattern accounted for more than 30% among simulations excluding no detection pattern.

240

241 **Simulated early detection ability largely depends on the choice of patch-level**  
242 **ES population coverage ( $p_c$ ).**

243 We explored the impact of the patch-level ES population coverage ( $p_c$ ) on simulated early detection  
244 ability for the IMP-POP/ES-POP scenario. The parameter  $p_c$  modulated the balance between the  
245 concentration of ES placement in a single patch and the dispersion of ES sites across patches  
246 under a fixed national ES population coverage. The simulated early detection ability remained  
247 nearly consistent for  $p_c$  values greater than 5%, given the same number of ES-covered patches (Fig  
248 4A). Considering the observed district-level ES population coverages in South Africa all exceeding  
249 10% (with a median of 22.5%), the early detection ability would be robust despite large variations in  
250 ES coverage in those districts (Table S3 in S1 text).

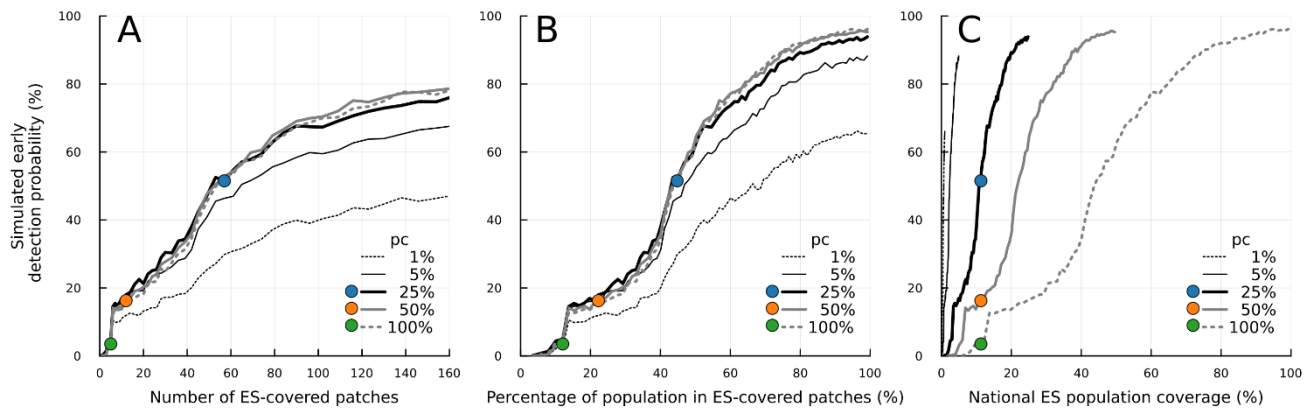

251

252 **Fig 4. Sensitivity analysis of the patch-level ES population coverage ( $p_c$ ) for IMP-POP/ES-POP**

253 **scenario.** (A, B, C) Simulated early detection probability is plotted (A) against the number of ES-

254 covered patches, (B) against the percentage of the population in ES-covered patches, and (C) the

255 national ES population coverage. Black lines represent simulation results for each of  $p_c$  and the

256 number of ES-covered patches. The coloured data points in (A-C) represent simulations where the

257 simulated national ES population coverage aligned with the observed national ES population

258 coverage in South Africa (11.3%), under  $p_c$  of 25% (blue), 50% (orange) and 100% (green). The

259 national ES population coverage is given by the product of  $p_c$  and the percentage of the population

260 in ES-coverage patches. It is noted that the maximum number of ES-covered patches is 1502 and

261 the x-axis for (A) is limited to a maximum value of 160.

262

263 Since the higher  $p_c$  value leads to a larger ES-covered population with limited ES-covered sites, we

264 plotted the coloured points representing the simulation results where the simulated national ES

265 population coverage matched the observed coverage (Fig 4A). Under such a constraint, when  $p_c$

266 =100%, only 5 sites were required to achieve the observed national ES population coverage but the

267 combined sensitivity of these sites resulted in a low simulated probability of early detection (Fig 4A,

268 green circle). Lower  $p_c$  values correspond with many ES-covered patches, which in turn increased

269 simulated early detection probability (Fig 4A, blue circle).

270 To further illustrate the role of the patch-level ES population coverage parameter, the same

271 simulation results are displayed in two different x-axes. First, we employed the percentage of the

272 population in ES-covered patches, which was calculated by the sum of the population in ES-  
273 covered patches divided by the total population size (Fig 4B). It is noted that  $(1 - p_c)\%$  of the  
274 population was not covered by ES but counted in the denominator. The tendency of simulated early  
275 detection probability was similar to Fig 4A. Second, we considered the national ES population  
276 coverage as the x-axis, which was calculated by multiplying  $p_c$  with the “percentage of the  
277 population in ES-covered patches” to correctly account for the population covered by ES. Even  
278 though the same national ES population coverage was maintained (Fig 4C, coloured points), the  
279 simulated early detection ability largely depended on the choice of  $p_c$ . This large variation implies  
280 the national ES population coverage would be an unreliable measurement to evaluate the spatial  
281 arrangements of the ES sites for the early detection ability. This tendency was consistent across the  
282 sensitivity analyses under the other 5 scenarios (Fig S14-15 in S1 text).

283

## 284 **Correlations between simulated early detection probability and weighted** 285 **average minimum distance to ES-covered patches**

286 We explored more parsimonious assessment measurements for the ES site layout across the  
287 countries since our stochastic simulations required a long computation time. We calculated the  
288 average minimum distance from patches with importation to ES-covered patches weighted by  
289 outbreak probability. The outbreak probability in the present study is defined as the probability of 10  
290 or more infections occurring given a single introduction, considering the effective immunisation  
291 proportion (EIP) in each patch (Fig S9 in S1 text). This metric can be calculated if importation risks  
292 and ES site layout are available. Intuitively, early detection probability is likely to be higher if ES-  
293 covered patches are placed near locations for importation. In this exercise, we wanted to explore  
294 whether assumptions on importation and ES placement consistently influenced this property.

295 The relationship between simulated early detection probability and weighted average minimum  
296 distance showed a shape similar to an exponential curve for the IMP-POP and IMP-LBC scenarios  
297 (Fig 5A&B). Once the simulated early detection probability surpassed 50%, this relationship

298 transitioned towards a nearly linear trend. Although the shape for these relationships was similar for  
 299 ES-POP and ES-LBC scenarios, the scale of weighted average minimum distance was different.

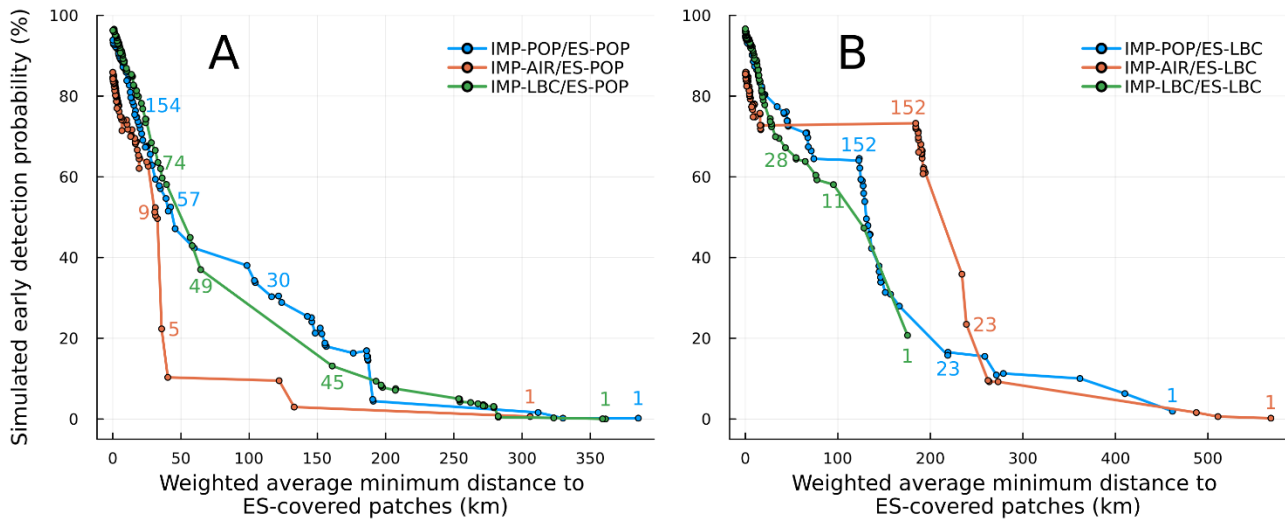

300

301 **Fig 5. Relationship between the weighted average minimum distance to ES-covered patches**  
 302 **and simulated early detection probability (%).** (A) Under ES-POP scenarios. (B) Under ES-LBC  
 303 scenarios. Minimum distances to ES-covered patches were weighted by importation risk and  
 304 outbreak probability of 10 or more infections occurring, considering the effective immunisation  
 305 proportion. The coloured numbers next to points correspond to the number of ES-covered patches  
 306 for each importation risk distribution.

307

308 In contrast, the relationship between simulated early detection ability and weighted average  
 309 minimum distance showed an irregular pattern in IMP-AIR scenarios. We observed a sharp increase  
 310 in simulated early detection probability despite a small difference in weighted average minimum  
 311 distance in both ES-POP and ES-LBC. Conversely, only a small difference in simulated early  
 312 detection probability was present despite a large difference in weighted average minimum distance.  
 313 Notably, in the IMP-AIR/ES-LBC scenario, when the number of ES-covered patches exceeded 152,  
 314 there was no increase in simulated early detection probability despite a more than 100km decline in  
 315 the weighted average minimum distance to ES-covered patches.



## 316 Discussion

317 In this study, we assessed the quantitative relationship between early detection ability and the scale  
318 and locations of ES sites by employing a meta-population framework. We simulated the importation,  
319 spread and detection process, varying the number of ES-covered sites under different importation  
320 risk distributions and ES site layout strategies. By applying stochastic simulations, we successfully  
321 considered the partial detection patterns (i.e. ES only detection or AFP surveillance only detection)  
322 to align with real-world observations. The results provided here illustrated the potential of strategic  
323 positioning of ES sites to enhance early detection capabilities and clarified key ES-related  
324 parameters to be considered. Our results also highlight the importance of poliovirus importation risk  
325 assessment and how infectious disease surveillance should be tailored to perceived threats.

326 We found that simulated early detection probability exhibited a monotonic increase with the number  
327 of ES sites, but distinct variations in slope and plateau points were observed across six different  
328 scenarios. When importation risks were concentrated in confined patches, the modest number of  
329 strategic and targeted ES positioning can be highly efficient in the early detection of poliovirus  
330 circulation. Conversely, if importation risk was geographically dispersed, the effectiveness of ES  
331 was diminished, and many ES sites were required for a high early detection ability. It is noted that in  
332 our simulation study, we did not consider delays in reporting from the onset of AFP or delays in  
333 processing environmental samples. The reporting delays in patients with AFP were substantial in  
334 resource-limited settings, which could be around 29–74 days [22], and those delays should be  
335 considered in practice.

336 Our sensitivity analysis showed large variations in simulated early detection probability depending  
337 on the patch-level ES population coverage given the same national ES population coverage, which  
338 poses the challenge of translating our simulation results into the practical ES implementation  
339 strategy. Although national ES population coverage can be easily calculated, this measurement  
340 would poorly reflect early detection ability for the ES layout unless a patch-level ES population  
341 coverage is precisely specified. On the other hand, it is difficult to relate a patch in our simulations to



342 real-world geographical settings. We roughly assumed the spatial resolution of each patch was  
343 equal to 20 x 20 km (i.e. 400 km<sup>2</sup>) regardless of urban and rural areas and made homogenous  
344 mixing assumptions within a patch. This assumption led to unreasonable model-based conclusions  
345 that ES sites should cover as small a proportion of the population within a patch as possible and as  
346 many patches as possible, resulting in high early detection probability with low national ES  
347 population coverage (requiring fewer resources) (Fig 4C). This result is an artefact of assuming that  
348 all individuals within a patch mix homogeneously, and therefore a tiny ES area coverage within a  
349 patch would have an unreasonably high probability of detecting poliovirus. Thus, crucial information  
350 for connecting models with real-world settings is needed to identify areas where homogenous  
351 mixing is held, and in other words, to identify the fragmentation level of patches, as is historically  
352 pointed out by several authors [26–29]. One study of COVID-19 provided some insights into the  
353 homogenous mixing assumptions. This study used virus genome data with corresponding resident  
354 addresses in Danne, Scotland, suggesting around a 5km radius circle was well mixed in terms of  
355 genetic distance [30]. An alternative approach would have been to reduce patch size, for example to  
356 5 x 5 km, which may align better with the size of ES catchments and assumptions on homogenous  
357 mixing. However, this procedure results in a large increase in computation time, and the catchment  
358 size of environmental sites is typically unavailable in low- and middle-income settings and we are  
359 therefore trying to align simulations with a uncertain value. An improved understanding of catchment  
360 sizes in real-world settings is warranted because our study illustrates the sensitivity to assumptions  
361 on catchment (or patch) size on early detection ability.

362 The sampling frequency is a parameter of interest to optimise the ES site layout [17,23]. By  
363 employing a daily sampling strategy in our study, the ES early detection ability increased  
364 significantly. However, this strategy resulted in an increased proportion of the ES only detection  
365 pattern, which might cause overacting against such an importation that does not lead to secondary  
366 infections. Assuming an equal number of environmental samples can be taken for each month,  
367 extending ES sites can be more efficient in improving early detection ability and be robust against  
368 various importation risk distributions. For example, if we assumed 20 ES-covered sites and monthly

369 sampling for the IMP-POP/ES-POP scenario, doubling sampling frequency led to a 10% increase in  
370 simulated early detection probability while doubling ES-covered sites resulted in the same increase  
371 and more resilience against multiple importation risk distributions. Moreover, the latter strategy can  
372 minimise the proportion of the ES only detection pattern. One concerning point is that expanding ES  
373 sites requires much more cost and additional human resources for transportation than increasing  
374 sampling frequency [16,31].

375 The basic reproduction number ( $R_0$ ) for poliovirus is difficult to determine due to the small number of  
376 reported paralytic cases per outbreak and the impact of changes in hygiene. Our sensitivity analysis  
377 of  $R_0$  showed small differences in simulated early detection probabilities, supporting the high  
378 robustness of results in the present study. Our assumed  $R_0$  for the main analysis was based on a  
379 review of transmissibility by Fine et al. from 1999 [32], and the hygiene level in the African continent  
380 has since greatly improved. We therefore expect the current  $R_0$  value in South Africa will be lower,  
381 but the sensitivity analysis would be well within the bounds of potential  $R_0$  values. One study  
382 quantitatively investigated the early detection ability varying  $R_0$  and other pathogen characteristics  
383 using a branching process [22] and found that the lead time for wastewater surveillance was  
384 different depending on  $R_0$ . Two reasons can be considered. First, our model assumed an effective  
385 reproduction number of around one by considering vaccination coverage. So, the variation of the  
386 effective reproduction number was smaller compared to the range of  $R_0$  investigated in Andrew, et  
387 al. [22]. Second, we considered ES only detection patterns as early detection, which did not  
388 happen in the branching process model.

389 Our study is not free from limitations. First, we considered the country where OPV and inactivated  
390 polio vaccine (IPV) are routinely administered. The large outbreak of VDPV2 was caused by  
391 switching from trivalent OPV to bivalent OPV [33], and many countries are planning to cease OPV  
392 usage except for outbreak response [34,35]. Moreover, in many developed countries, IPV is only  
393 included in their routine immunisation schedule. Those vaccinated with only IPV could spread  
394 poliovirus to others due to lack of mucosal immunity and could be detected through ES, but they  
395 would be less likely to develop AFP due to the humoral immunity, implying increased utility of the ES

396 compared to our study (where an IPV-OPV schedule is assumed). Second, we only focused on  
397 WPV1 and did not consider other serotypes (such as cVDPVs) or transmission from immune-  
398 compromised individuals shedding (iVDPVs).

399 Third, we limited transmission dynamics in children under 5 years old, assuming those aged 5 or  
400 more were completely immunised. However, the reported age distribution of poliomyelitis patients is  
401 skewed towards older groups in non-endemic countries [36], and multiple reasons for being  
402 unvaccinated were considered such as migration, poverty and conflict [37–39]. We ignored those  
403 pocket populations considering the size of that population and the paucity of historical vaccine  
404 coverage data in South Africa. Fourth, our importation risk distributions were essentially based on  
405 the population size of each patch and the approximated mobilisation pattern by the radiation model,  
406 which could make the ES performance better when compared to reality. Quantitative data about  
407 international traveller movement from airports and border crossing populations could improve  
408 predictions that support risk assessment. Furthermore, research on the importation pathway is  
409 demanding for prevention, detection and response. The importation routes to reported outbreak  
410 sites were often unknown and one to three years of cryptic circulation was suspected for some  
411 outbreaks [25]. Lastly, parameters for ES sensitivity, which was described by the lognormal  
412 distribution, were estimated using the wastewater surveillance data for COVID-19 in the US [40].  
413 Considering differences in virus shedding characteristics between poliovirus [41] and COVID-19  
414 [42,43] as well as differences in ES site system and quality between the US and other low- and  
415 middle-income countries, the ES sensitivity will be inherently different, underscoring the need for  
416 region-specific data to assess site-specific ES sensitivity.

417 In conclusion, several countries are planning to initiate, expand and optimise the ES for poliovirus.  
418 We varied the number and location of the ES sites under different importation risk distributions to  
419 quantify the ES early detection ability over AFP surveillance. Our results showed that risk-targeted  
420 ES site layout could achieve high early detection capabilities. Further research is required to  
421 optimise resources for the ES to monitor the progress toward polio eradication.

## 422 **Material and Methods**

### 423 **Data**

424 We collated population data for children under 5 years old and for all age groups in 100m spatial  
425 resolution in South Africa and Mozambique from WorldPop, respectively [44]. We aggregated each  
426 dataset to obtain a 20km spatial resolution and called each unit of area a 'patch' within a meta-  
427 population framework. We removed patches with less than 100 children under 5 years old for  
428 computational efficiency, resulting in 1502 patches in South Africa (Fig S1 in S1 text).

429 We collated the district-level vaccination coverage from the Expanded Programme on Immunisation  
430 National Coverage Survey Report 2020 in South Africa [45]. South Africa included both bivalent  
431 OPV and IPV in their routine immunisation schedule. In South Africa's vaccine schedule, OPV is  
432 administered at birth and 6 weeks after birth, and IPV is administered as a part of the hexavalent  
433 vaccine (HEXA) at 6 weeks, 10 weeks, 14 weeks, and 18 months after birth.

434 To quantitatively validate the choice of patch-level ES population coverage ( $p_c$ ), we obtained the  
435 wastewater plant information about the location and their served-population size from the National  
436 Institute for Communicable Diseases (NICD). The details of the wastewater data description and  
437 validation process can be found in Table S3-4 and Fig S8 in S1 text.

### 438 **Proportion of immunised children under 5 years old**

439 We assumed those vaccinated with at least one IPV also completed two doses of OPV in our  
440 simulation, and classified children into immunised and unimmunised ones. Immunised children are  
441 assumed to have no susceptibility and transmissibility because of mucosal immunity induced by  
442 OPV and they are assumed not to develop AFP because of serum antibody induced by IPV.  
443 Therefore, we removed immunised children from the transmission dynamics. Since the last known  
444 polio patient in South Africa was documented in 1989 [24], immunity from natural infection was not  
445 considered.

446 We calculated the proportion of children under 5 years old who were effectively immunised, which  
447 we called the effective immunisation proportion (EIP), with the district-level coverage of IPV and  
448 assumptions of vaccine effectiveness against transmission. Let  $VE_p$  be the vaccine effectiveness per  
449 dose (0.63 against serotype 1 [46–48]) and the probability of immunisation after  $n$  doses of IPV  
450 ( $VE_n$ ) is calculated as  $1 - (1 - VE_p)^n$ . Considering the IPV coverage for  $n$ th dose ( $C_{v,n}$ ), the EIP can be  
451 estimated considering  $VE_n$  and the IPV coverage for  $n$ th dose ( $C_{v,n}$ ), which is described by  $C_{v,4}VE_4 +$   
452  $(C_{v,3} - C_{v,4})VE_3 + (C_{v,2} - C_{v,3})VE_2 + (C_{v,1} - C_{v,2})VE_1$ . When  $C_{v,n} < C_{v,n+1}$ , we assumed  $C_{v,n} - C_{v,n+1}$  to be  
453 zero. We calculated the district-level EIPs (Table S1 and Fig S2 in S1 text) and assigned them as  
454 the corresponding patch-level EIP. The average EIP weighted by the population size of children  
455 under 5 years old in each patch in South Africa was 91.9%.

## 456 **Modelling framework**

457 We constructed a stochastic meta-population model among unimmunised children under 5 years old  
458 considering the detection process of poliovirus through AFP surveillance and ES. The model  
459 comprises three components: the transmission model, the AFP surveillance model, and the ES  
460 model. In each simulation, we randomly chose one patch to introduce WPV1 proportional to the  
461 assumed importation risks of each patch and ran the stochastic SEIR meta-population model until  
462 one of the following criteria was met: the first poliovirus was detected through both surveillance, no  
463 polio patients were present, or 3 years had passed from the beginning of the simulation.

464 Since the first detection timing through ES is largely influenced by the distribution of importation  
465 risks and ES site layout strategy, we prepared three importation risk distributions and two ES site  
466 layout strategies as follows (Fig 1, Fig S7-8 in S1 text and S1-2 Video):

- 467 - IMP-POP denotes ‘Population size’-based importation risk distribution and assumes the  
468 importation risk of each patch is proportional to the population size of each patch.
- 469 - IMP-AIR denotes ‘International airport’-based importation risk distribution and assumes the  
470 importation risk of each patch is proportional to international inbound travel volume in 2019 and  
471 further considers mobilisation from airports.

- 472 - IMP-LBC denotes ‘Land border crossing’-based importation risk distribution and assumes the  
473 importation risk of each patch is proportional to travelling volume from Mozambique, which is  
474 approximated by the radiation model.
- 475 - ES-POP corresponds to ‘Population size’-based ES site layout strategy, and assumes the ES is  
476 implemented in the descending order of population size of each patch.
- 477 - ES-LBC corresponds to ‘Land border crossing importation risk’-based ES site layout strategy  
478 and assumes the ES is first implemented in a patch with a high importation risk via land border  
479 crossing from Mozambique.

480 We considered the combination of each importation risk distribution and ES site layout strategy,  
481 totalling 6 scenarios: IMP-POP/ES-POP, IMP-AIR/ES-POP, IMP-LBC/ES-POP, IMP-POP/ES-LBC,  
482 IMP-AIR/ES-LBC, and IMP-LBC/ES-LBC. We included the land border crossing scenarios to assess  
483 the early detection ability against the poliovirus introduction in rural settings with an informed ES  
484 layout strategy (i.e. IMP-LBC/ES-LBC scenario).

485 In each scenario, we ran 10,000 simulations and calculated the proportion of each detection pattern,  
486 varying the number of ES-covered patches. All analyses were performed in Julia v1.8.3.

## 487 **Transmission model**

488 We employed a stochastic meta-population SEIR model among unimmunised children under 5  
489 years old (Fig S3 in S1 text). The SEIR model simulates the process in which susceptible individuals  
490 (S) get infected, passing through a latent period (E) and infectious period (I), and then recover from  
491 infection (R). The daily hazard rate for newly infected individuals in patch  $i$  at day  $t$  is expressed as

$$492 \quad \lambda_{i,t} = \frac{\beta}{N_{i,c}} \left[ (1 - \alpha)(I_{i,c,t} + I_{i,nc,t}) + \alpha \sum_{j \neq i} \pi_{ji}(I_{j,c,t} + I_{j,nc,t}) \right], \quad (1)$$

493 where  $\beta$  corresponds to the transmission rate,  $N_{i,c}$  is the population size of children under 5 years  
494 old of patch  $i$  regardless of immunity status,  $\alpha$  corresponds to the travelling rate between patches  
495 and  $\pi_{ji}$  denotes the rates of moving from origin  $j$  to destination  $i$ . The moving rates ( $\pi_{ji}$ ) were

496 approximated by the radiation model, which showed an improved fit to data than the gravity model  
497 in the polio context [49–51]. We classified the infectious individual compartment into two classes:  
498 infectious individuals at patch  $i$  covered by the ES at day  $t$  ( $I_{i,c,t}$ ) and not covered by the ES ( $I_{i,nc,t}$ ).  
499 Infected individuals in the latent period (E) are randomly assigned to  $I_{i,c,t}$  or  $I_{i,nc,t}$  proportional to the  
500 patch-level ES population coverage ( $p_c$ ) and  $1 - p_c$ , respectively. However, assumptions on  
501 infectiousness did not differ between groups.

## 502 **AFP surveillance model**

503 Patients with WPV1 develop AFP with a probability of 1/200, and we assumed those patients seek  
504 healthcare on the same day as the paralysis onset. The incubation period of developing AFP was  
505 assumed to be 16.5 days [52,53] and we prepared 6 compartments with transition rates of 0.329  
506 days<sup>-1</sup> to be aligned with the incubation period distribution [47].

507 To be correctly diagnosed and reported as AFP cases, patients should visit health care, be tested,  
508 and get a positive result. We assumed the probability of correctly reporting AFP cases followed the  
509 Binomial process considering the above three steps.

## 510 **Environmental surveillance model**

511 ES was implemented in limited patches and its number was varied in each scenario. ES is assumed  
512 to cover a portion of the population ( $p_c$ ) in each patch. We chose a default  $p_c$  of 25% by considering  
513 the observed ES location and ES-covered population (Table S3-4 and Fig S8).

514 We modelled the detection process through ES as a binomial process. Let  $n_{i,t}$  be an index variable  
515 for sampling at location  $i$  at day  $t$  (taking 0 or 1), and  $P_{ES,test}$  be a test sensitivity given a collected  
516 sample contains a detectable level of virus. The number of polio-positive samples in the ES site at  
517 patch  $i$  at day  $t$  ( $w_{i,t}$ ) is given by

$$518 \quad w_{i,t} \sim \text{Binomial} \left( n_{i,t}, G \left( 100,000 \frac{I_{i,c,t}}{N_i p_c}; \mu_{ES}, \sigma_{ES} \right) P_{ES,test} \right), \quad (2)$$



519 where  $N_i$  denotes the population size of all age groups in patch  $i$ , and  $G$  denotes the cumulative  
520 density function of the log-normal distribution with parameters of  $\mu_{ES}$  and  $\sigma_{ES}$ , which represents the  
521 ES sensitivity against the incidence rate of polio patients per 100,000 population. The ES sensitivity  
522 parameters were estimated based on the wastewater surveillance study on COVID-19 [40]. To  
523 ensure the consistent quality of ES in each sampling site for estimation, we used sampling sites with  
524 both positive and negative samples, where daily newly reported cases on the day with positive  
525 samples were consistently higher than on the day with negative samples. The estimated dose-  
526 relationship for the ES sensitivity can be seen in Fig S6 in S1 text.

### 527 **Sensitivity analysis and weighted minimum distance to ES-covered patches**

528 We performed the sensitivity analyses of the basic reproduction number ( $R_0$ ), travelling rate  
529 between patches ( $\alpha$ ), sampling frequency and ES sensitivity for the IMP-POP/ES-POP scenario. For  
530 a patch-level ES population coverage ( $p_c$ ), sensitivity analysis was conducted for all 6 scenarios.  
531 Additionally, we conducted the sensitivity analysis under a single patch setting (i.e. simulations were  
532 performed without spatial structures). This analysis aimed to differentiate between the effects of  
533 parameters on the ES early detection ability attributable to spatial components and those stemming  
534 from model behaviours in a single patch (Fig S10 in S1 text).

535 Since our stochastic meta-population model requires a huge computational burden, we explored an  
536 alternative parsimonious assessment measurement for the ES early detection ability. Assuming the  
537 importation risk distributions and EIPs are known at a patch level, we calculated the average  
538 minimum distance to ES-covered patches weighted by importation risk and outbreak probability of  
539 10 or more infections occurring ( $d_{ave,w}$ ). The outbreak probability was based on the branching  
540 process considering the effective reproduction number in patch  $i$  ( $R_{e,i}$ ) while the effective  
541 reproduction number was given by the product of  $R_0$  and EIP in patch  $i$  (Fig S9 in S1 text). We  
542 calculated the probability of 10 or more infections occurring given the effective reproduction number,  
543  $P(X \geq 10; R_{e,i})$ , assuming the off-spring distribution follows the Poisson distribution [54–56]. Then,  
544 the average minimum distance  $d_{ave,w}$  is described as



545 
$$d_{ave,w} = \frac{\sum_i r_i P(X \geq 10; R_{e,i}) \min(\{d_{ij}; j \in S_{ES}\})}{\sum_i r_i P(X \geq 10; R_{e,i})}, \quad (3)$$

546 where  $r_i$  denotes the importation risk at patch  $i$  and  $S_{ES}$  denotes the set of patches covered by the  
547 ES. The detailed explanations can be found in S1 text.

548

## 549 **Funding**

550 This study received the 2022-23 MSc Projects Funding (Trust Funds) from the London School of  
551 Hygiene & Tropical Medicine. TRA is supported by the Rotary Foundation (GG2350294), the  
552 Nagasaki University World-leading Innovative & Smart Education (WISE) Program of the Japanese  
553 Ministry of Education, Culture, Sports, Science and Technology and the Japan Society for the  
554 Promotion of Science (JSPS) KAKENHI Grant-in-Aid for JSPS Fellows (JP24KJ1827). KMO  
555 acknowledges funding from the Bill and Melinda Gates Foundation (INV-049314 and INV-049298).  
556 The funders had no role in study design, data collection and analysis, decision to publish, or  
557 preparation of the manuscript.

## 558 **Conflict of interest**

559 No conflicts of interest.

## 560 **Acknowledgements**

561 We thank Juliet R. C. Pulliam for insightful comments to improve result presentations and Kerrigan  
562 McCarthy for sharing wastewater plant-related information.

## 563 **Author contributions**

564 Conceptualisation: TRA, KMO. Data curation: TRA. Formal analysis: TRA. Funding acquisition:  
565 TRA, KMO. Investigation: TRA. Methodology: TRA, KMO. Resources: TRA, KMO. Software: TRA.

566 Supervision: KMO. Validation: TRA. Visualisation: TRA. Writing – original draft: TRA. Writing –  
567 review & editing: KMO.

## 568 **Data availability statement**

569 All the data and code are deposited on GitHub

570 ([https://github.com/toshiakiasakura/polio\\_environmental\\_surveillance](https://github.com/toshiakiasakura/polio_environmental_surveillance)).

## 571 **Supporting information**

572 **S1 Text. Supplementary methods and results.**

573 **S1 Video. Simulated incremental implementation of environmental surveillance (ES) with the**

574 **‘Population size’-based ES site layout strategy (ES-POP).** ES sites were implemented in

575 descending order of the population size of each patch. Blue squared areas represent patches

576 covered by ES sites.

577 **S2 Video. Simulated incremental implementation of environmental surveillance (ES) with the**

578 **‘Land border crossing importation risk’-based ES site layout strategy (ES-LBC).** ES sites were

579 first implemented in a patch with a high importation risk via land border crossing from Mozambique.

580 Blue squared areas represent patches covered by ES sites.

## 581 **References**

582 1. Badizadegan K, Kalkowska DA, Thompson KM. Polio by the numbers—A global perspective. *J*  
583 *Infect Dis.* 2022 Oct 17;226(8):1309–18.

584 2. Mwengee W, Okeibunor J, Poy A, Shaba K, Mbulu Kinuani L, Minkoulou E, et al. Polio  
585 Eradication Initiative: Contribution to improved communicable diseases surveillance in WHO  
586 African region. *Vaccine.* 2016 Oct;34(43):5170–4.

587 3. Nathanson N, Kew OM. From emergence to eradication: The epidemiology of poliomyelitis  
588 deconstructed. *Am J Epidemiol.* 2010 Dec 1;172(11):1213–29.

589 4. Macklin GR, O’Reilly KM, Grassly NC, Edmunds WJ, Mach O, Santhana Gopala Krishnan R,  
590 et al. Evolving epidemiology of poliovirus serotype 2 following withdrawal of the serotype 2 oral  
591 poliovirus vaccine. *Science.* 2020 Apr 24;368(6489):401–5.

592 5. Cooper LV, Bandyopadhyay AS, Gumede N, Mach O, Mkanda P, Ndoutabé M, et al. Risk  
593 factors for the spread of vaccine-derived type 2 polioviruses after global withdrawal of trivalent  
594 oral poliovirus vaccine and the effects of outbreak responses with monovalent vaccine: a  
595 retrospective analysis of surveillance data for 51 countries in Africa. *Lancet Infect Dis.* 2022  
596 Feb 1;22(2):284–94.

- 597 6. Chen P, Liu Y, Wang H, Liu G, Lin X, Zhang W, et al. Environmental surveillance complements  
598 case-based surveillance of acute flaccid paralysis in Polio endgame strategy 2019–2023. *Appl*  
599 *Environ Microbiol.* 2020 Jul 20;86(15):e00702-20.
- 600 7. Voorman A, Lyons H, Bennette C, Kovacs S, Makam JK, F Vertefeuille J, et al. Analysis of  
601 population immunity to poliovirus following cessation of trivalent oral polio vaccine. *Vaccine.*  
602 2023 Apr 6;41 Suppl 1(Suppl 1):A85–92.
- 603 8. Bigouette JP. Update on vaccine-derived poliovirus outbreaks — Worldwide, January 2021–  
604 December 2022. *MMWR Morb Mortal Wkly Rep [Internet].* 2023 [cited 2024 Apr 11];72.  
605 Available from: <https://www.cdc.gov/mmwr/volumes/72/wr/mm7214a3.htm>
- 606 9. Johnson Muluh T, Hamisu AW, Craig K, Mkanda P, Andrew E, Adeniji J, et al. Contribution of  
607 environmental surveillance toward interruption of poliovirus transmission in Nigeria, 2012–  
608 2015. *J Infect Dis.* 2016 May 1;213(suppl 3):S131–5.
- 609 10. Rai A, Uwishema O, Uweis L, El Saleh R, Arab S, Abbass M, et al. Polio returns to the USA:  
610 An epidemiological alert. *Ann Med Surg [Internet].* 2022 Oct [cited 2024 Mar 20];82. Available  
611 from: <https://journals.lww.com/10.1016/j.amsu.2022.104563>
- 612 11. Link-Gelles R, Lutterloh E, Schnabel Ruppert P, Backenson PB, St. George K, Rosenberg ES,  
613 et al. Public health response to a case of paralytic poliomyelitis in an unvaccinated person and  
614 detection of poliovirus in wastewater — New York, June–August 2022. *MMWR Morb Mortal*  
615 *Wkly Rep.* 2022 Aug 19;71(33):1065–8.
- 616 12. Klapsa D, Wilton T, Zealand A, Bujaki E, Saxentoff E, Troman C, et al. Sustained detection of  
617 type 2 poliovirus in London sewage between February and July, 2022, by enhanced  
618 environmental surveillance. *Lancet.* 2022 Oct 29;400(10362):1531–8.
- 619 13. Shaw AG, Cooper LV, Gumede N, Bandyopadhyay AS, Grassly NC, Blake IM. Time taken to  
620 detect and respond to polio outbreaks in Africa and the potential impact of direct molecular  
621 detection and Nanopore sequencing. *J Infect Dis.* 2022 Aug 26;226(3):453–62.
- 622 14. Blake IM, Chenoweth P, Okayasu H, Donnelly CA, Aylward RB, Grassly NC. Faster detection  
623 of poliomyelitis outbreaks to support polio eradication. *Emerg Infect Dis.* 2016 Mar;22(3):449–  
624 56.
- 625 15. Duintjer Tebbens RJ, Diop OM, Pallansch MA, Oberste MS, Thompson KM. Characterising the  
626 costs of the Global Polio Laboratory Network: a survey-based analysis. *BMJ Open.* 2019  
627 Jan;9(1):e023290.
- 628 16. Kroiss SJ, Ahmadzai M, Ahmed J, Alam MM, Chabot-Couture G, Famulare M, et al. Assessing  
629 the sensitivity of the polio environmental surveillance system. Iturriza-Gómara M, editor. *PLoS*  
630 *ONE.* 2018 Dec 28;13(12):e0208336.
- 631 17. O'Reilly KM, Grassly NC, Allen DJ, Bannister-Tyrrell M, Cameron A, Carrion Martin AI, et al.  
632 Surveillance optimisation to detect poliovirus in the pre-eradication era: a modelling study of  
633 England and Wales. *Epidemiol Infect.* 2020;148:e157.
- 634 18. Praharaj I, Parker EPK, Giri S, Allen DJ, Silas S, Revathi R, et al. Influence of Nonpolio  
635 enteroviruses and the bacterial gut microbiota on oral poliovirus vaccine response: A study  
636 from South India. *J Infect Dis.* 2019 Apr 8;219(8):1178–86.

- 637 19. Organization WH, Initiative GPE. Field guidance for the implementation of environmental  
638 surveillance for poliovirus [Internet]. World Health Organization; 2023 [cited 2024 Apr 11].  
639 Available from: <https://iris.who.int/handle/10665/368833>
- 640 20. Cowger TL, Burns CC, Sharif S, Gary HE, Iber J, Henderson E, et al. The role of  
641 supplementary environmental surveillance to complement acute flaccid paralysis surveillance  
642 for wild poliovirus in Pakistan – 2011–2013. De La Torre JC, editor. PLoS ONE. 2017 Jul  
643 25;12(7):e0180608.
- 644 21. Ranta J, Hovi T, Arjas E. Poliovirus surveillance by examining sewage water specimens:  
645 Studies on detection probability using simulation models. Risk Anal. 2001 Dec;21(6):1087–96.
- 646 22. Liu AB, Lee D, Jaliha AP, Hanage WP, Springer M. Quantitatively assessing early detection  
647 strategies for mitigating COVID-19 and future pandemics. Nat Commun. 2023 Dec  
648 20;14(1):8479.
- 649 23. Olejarz JW, Roster KIO, Kissler SM, Lipsitch M, Grad YH. Optimal environmental testing  
650 frequency for outbreak surveillance. Epidemics. 2024 Mar;46:100750.
- 651 24. Chezzi C, Blackburn NK, Schoub BD. Molecular characterisation of type 1 polioviruses  
652 associated with epidemics in South Africa. J Med Virol. 1997 May;52(1):42–9.
- 653 25. Davlantes E, Greene SA, Tobolowsky FA, Biya O, Wiesen E, Abebe F, et al. Update on wild  
654 poliovirus type 1 outbreak — Southeastern Africa, 2021–2022. MMWR Morb Mortal Wkly Rep.  
655 2023 Apr 14;72(15):391–7.
- 656 26. Hagenaars TJ, Donnelly CA, Ferguson NM. Spatial heterogeneity and the persistence of  
657 infectious diseases. J Theor Biol. 2004 Aug;229(3):349–59.
- 658 27. Etienne RS, Heesterbeek JAP. On optimal size and number of reserves for metapopulation  
659 persistence. J Theor Biol. 2000 Mar;203(1):33–50.
- 660 28. Ball F, Britton T, House T, Isham V, Mollison D, Pellis L, et al. Seven challenges for  
661 metapopulation models of epidemics, including households models. Epidemics. 2015  
662 Mar;10:63–7.
- 663 29. Riley S, Eames K, Isham V, Mollison D, Trapman P. Five challenges for spatial epidemic  
664 models. Epidemics. 2015 Mar;10:68–71.
- 665 30. Gamža A, Lycett S, Harvey W, Hughes JH, Nickbakhsh S, Robertson D, et al. Spatial analysis  
666 of phylogenetic, population and deprivation data from Scottish SARS-CoV-2 outbreak reveals  
667 patterns of the community transmission. SSRN Journal [Internet]. 2023 [cited 2024 Mar 20];  
668 Available from: <https://www.ssrn.com/abstract=4655074>
- 669 31. Hamisu AW, Blake IM, Sume G, Braka F, Jimoh A, Dahiru H, et al. Characterizing  
670 environmental surveillance sites in Nigeria and their sensitivity to detect poliovirus and other  
671 enteroviruses. J Infect Dis. 2022 Apr 19;225(8):1377–86.
- 672 32. Fine PEM, Carneiro IAM. Transmissibility and persistence of oral polio vaccine viruses:  
673 Implications for the Global Poliomyelitis Eradication Initiative. Ame J Infect. 1999 Nov  
674 15;150(10):1001–21.
- 675 33. Macklin GR, O'Reilly KM, Grassly NC, Edmunds WJ, Mach O, Santhana Gopala Krishnan R,  
676 et al. Evolving epidemiology of poliovirus serotype 2 following withdrawal of the serotype 2 oral  
677 poliovirus vaccine. Science. 2020 Apr 24;368(6489):401–5.

- 678 34. Kalkowska DA, Wassilak SG, Wiesen E, F Estivariz C, Burns CC, Badizadegan K, et al.  
679 Complexity of options related to restarting oral poliovirus vaccine (OPV) in national  
680 immunization programs after OPV cessation. *Gates Open Res.* 2023 Apr 17;7:55.
- 681 35. Thompson KM, Kalkowska DA. Potential future use, costs, and value of poliovirus vaccines.  
682 *Risk Anal.* 2021 Feb;41(2):349–63.
- 683 36. Wagner BG, Behrend MR, Klein DJ, Upfill-Brown AM, Eckhoff PA, Hu H. Quantifying the  
684 impact of expanded age group campaigns for polio eradication. Bauch CT, editor. *PLoS ONE.*  
685 2014 Dec 1;9(12):e113538.
- 686 37. Weiss WM, Winch PJ, Burnham G. Factors associated with missed vaccination during mass  
687 immunization campaigns. *J Health Popul Nutr.* 2009 Sep 15;27(3):358–67.
- 688 38. Habib MA, Soofi S, Cousens S, Anwar S, Haque NU, Ahmed I, et al. Community engagement  
689 and integrated health and polio immunisation campaigns in conflict-affected areas of Pakistan:  
690 a cluster randomised controlled trial. *The Lancet Global Health.* 2017 Jun;5(6):e593–603.
- 691 39. Mohammed A, Tomori O, Nkengasong JN. Lessons from the elimination of poliomyelitis in  
692 Africa. *Nat Rev Immunol.* 2021 Dec;21(12):823–8.
- 693 40. Wu F, Xiao A, Zhang J, Moniz K, Endo N, Armas F, et al. Wastewater surveillance of SARS-  
694 CoV-2 across 40 U.S. states from February to June 2020. *Water Research.* 2021  
695 Sep;202:117400.
- 696 41. Duintjer Tebbens RJ, Pallansch MA, Chumakov KM, Halsey NA, Hovi T, Minor PD, et al. Expert  
697 review on poliovirus immunity and transmission. *Risk Anal.* 2013 Apr;33(4):544–605.
- 698 42. Miura F, Kitajima M, Omori R. Duration of SARS-CoV-2 viral shedding in faeces as a  
699 parameter for wastewater-based epidemiology: Re-analysis of patient data using a shedding  
700 dynamics model. *Sci Total Environ.* 2021 May;769:144549.
- 701 43. Natarajan A, Zlitni S, Brooks EF, Vance SE, Dahlen A, Hedlin H, et al. Gastrointestinal  
702 symptoms and fecal shedding of SARS-CoV-2 RNA suggest prolonged gastrointestinal  
703 infection. *Med.* 2022 Jun;3(6):371-387.e9.
- 704 44. Tatem AJ. WorldPop, open data for spatial demography. *Sci Data.* 2017 Jan 31;4(1):170004.
- 705 45. Republic of South Africa Expanded Programme on Immunisation (EIP) national coverage  
706 survey report 2020 [Internet]. Department of Health, Pretoria, South Africa; Available from:  
707 [https://www.health.gov.za/wp-content/uploads/2022/03/National-EPI-Coverage-Survey\\_Final-](https://www.health.gov.za/wp-content/uploads/2022/03/National-EPI-Coverage-Survey_Final-full-report-Dec-2020.pdf)  
708 [full-report-Dec-2020.pdf](https://www.health.gov.za/wp-content/uploads/2022/03/National-EPI-Coverage-Survey_Final-full-report-Dec-2020.pdf)
- 709 46. Grassly NC. Immunogenicity and effectiveness of routine immunization with 1 or 2 doses of  
710 inactivated poliovirus vaccine: systematic review and meta-analysis. *J Infect Dis.* 2014 Nov  
711 1;210(suppl\_1):S439–46.
- 712 47. Molodecky NA, Jafari H, Safdar RM, Ahmed JA, Mahamud A, Bandyopadhyay AS, et al.  
713 Modelling the spread of serotype-2 vaccine derived-poliovirus outbreak in Pakistan and  
714 Afghanistan to inform outbreak control strategies in the context of the COVID-19 pandemic.  
715 *Vaccine.* 2023 Apr;41:A93–104.
- 716 48. Thompson KM, Pallansch MA, Duintjer Tebbens RJ, Wassilak SG, Kim JH, Cochi SL.  
717 Preradication vaccine policy options for poliovirus infection and disease control. *Risk Anal.*  
718 2013 Apr;33(4):516–43.

- 719 49. Molodecky NA, Blake IM, O'Reilly KM, Wadood MZ, Safdar RM, Wesolowski A, et al. Risk  
720 factors and short-term projections for serotype-1 poliomyelitis incidence in Pakistan: A  
721 spatiotemporal analysis. Viboud C, editor. PLoS Med. 2017 Jun 12;14(6):e1002323.
- 722 50. Voorman A, O'Reilly K, Lyons H, Goel AK, Touray K, Okiror S. Real-time prediction model of  
723 cVDPV2 outbreaks to aid outbreak response vaccination strategies. Vaccine. 2023  
724 Apr;41:A105–12.
- 725 51. Mangal TD, Aylward RB, Shuaib F, Mwanza M, Pate MA, Abanida E, et al. Spatial dynamics  
726 and high risk transmission pathways of poliovirus in Nigeria 2001-2013. Codeço CT, editor.  
727 PLoS ONE. 2016 Sep 26;11(9):e0163065.
- 728 52. Grassly NC, Fraser C, Wenger J, Deshpande JM, Sutter RW, Heymann DL, et al. New  
729 strategies for the elimination of polio from India. Science. 2006 Nov 17;314(5802):1150–3.
- 730 53. Casey AE. The incubation period in epidemic poliomyelitis. JAMA. 1942 Nov 14;120(11):805.
- 731 54. Farrington CP. Branching process models for surveillance of infectious diseases controlled by  
732 mass vaccination. Biostatistics. 2003 Apr 1;4(2):279–95.
- 733 55. Nishiura H, Yan P, Sleeman CK, Mode CJ. Estimating the transmission potential of  
734 supercritical processes based on the final size distribution of minor outbreaks. J Theor Biol.  
735 2012 Feb;294:48–55.
- 736 56. Blumberg S, Funk S, Pulliam JRC. Detecting differential transmissibilities that affect the size of  
737 self-limited outbreaks. Wilke CO, editor. PLoS Pathog. 2014 Oct 30;10(10):e1004452.

738

739

740



# Supplementary material for Assessing early detection ability through spatial arrangements in environmental surveillance for poliovirus: a simulation-based study

Toshiaki R. Asakura\*, Kathleen M. O'Reilly

\* Corresponding to [toshiaki.asakura1@lshtm.ac.uk](mailto:toshiaki.asakura1@lshtm.ac.uk)

## Contents

|       |                                                                                               |    |
|-------|-----------------------------------------------------------------------------------------------|----|
| 1     | Supplementary Methods .....                                                                   | 3  |
| 1.1   | Data.....                                                                                     | 3  |
| 1.2   | Ethical statement.....                                                                        | 5  |
| 1.3   | Modelling framework.....                                                                      | 6  |
| 1.3.1 | Transmission model.....                                                                       | 6  |
| 1.3.2 | AFP surveillance model .....                                                                  | 11 |
| 1.3.3 | Environmental surveillance model .....                                                        | 11 |
| 1.3.4 | Importation risk distributions .....                                                          | 13 |
| 1.3.5 | ES site layout strategies and a patch-level ES population coverage ( $p_c$ ).....             | 14 |
| 1.3.6 | Model parameter specification .....                                                           | 17 |
| 1.4   | Outcome measures .....                                                                        | 19 |
| 1.5   | Average minimum distance to ES-covered patches and simulated early detection probability..... | 19 |
| 1.6   | Simulation implementation.....                                                                | 20 |
| 2     | Supplementary results .....                                                                   | 21 |
| 2.1   | Characteristics for the top 20 populous patches .....                                         | 21 |
| 2.2   | Simulation results under a single patch setting. ....                                         | 22 |
| 2.3   | Different visualisations for the main analysis.....                                           | 24 |
| 2.4   | Sensitivity analysis on the patch-level ES population coverage for different scenarios .....  | 26 |
| 3     | References .....                                                                              | 28 |

## List of Tables

|                                                                                                                                                                                                                                                 |    |
|-------------------------------------------------------------------------------------------------------------------------------------------------------------------------------------------------------------------------------------------------|----|
| Table S1. OPV coverage (%), HEXA coverage (%) and effective immunisation proportion (EIP, %) by districts in South Africa. ....                                                                                                                 | 4  |
| Table S2. Discrete Markov process for each time step. ....                                                                                                                                                                                      | 9  |
| Table S3. Approximated ES-covered population size in districts with ES sites in South Africa as of 27 November 2023. ....                                                                                                                       | 15 |
| Table S4. Observed and simulated district-level ES population coverage for the ES-POP varying the patch-level ES population coverages ( $p_c$ ) given the simulated national ES population coverage was fixed at the observed one (11.3%). .... | 16 |
| Table S5. Model Parameters used for our simulation. ....                                                                                                                                                                                        | 18 |
| Table S6. Population size and effective immunisation proportion (EIP) for the top 20 populous patches. ....                                                                                                                                     | 21 |

## List of Figures

|                                                                                                                                                                                                                                        |    |
|----------------------------------------------------------------------------------------------------------------------------------------------------------------------------------------------------------------------------------------|----|
| Fig S1. Heatmap of population size in South Africa. (A) Children under 5 years old and (B) All ages. Patches with <100 children under 5 years old were removed from the analysis. ....                                                 | 3  |
| Fig S2. Estimated effective immunisation proportion by districts in South Africa, 2020. ....                                                                                                                                           | 5  |
| Fig S3. Schematic representation of our model, comprising of three parts: transmission model, AFP surveillance model and ES model. ....                                                                                                | 6  |
| Fig S4. Moving rates from origin $i$ to destination $j$ ( $\pi_{ij}$ ) approximated by the radiation model for the three most populous patches. ....                                                                                   | 8  |
| Fig S5. The proportion of individuals excreting the poliovirus regardless of the amount of virus shedding over time, which was scaled to be one for the probability density function and the fitted probability density function. .... | 10 |
| Fig S6. Dose-response curve for the ES sensitivity parameter against the number of infectious individuals per 100,000 population in a single patch. ....                                                                               | 12 |
| Fig S7. Importation risk distributions in a log10 scale (A) for IMP-POP, (B) IMP-AIR, and (C) IMP-LBC. ....                                                                                                                            | 14 |
| Fig S8. Environmental surveillance (ES) location maps. ....                                                                                                                                                                            | 17 |
| Fig S9. Histogram of the effective reproduction number for each patch and corresponding outbreak probability with $\geq 10$ infections. ....                                                                                           | 20 |
| Fig S10. Sensitivity analysis of parameters in a single patch setting. ....                                                                                                                                                            | 23 |
| Fig S11. Dose-response curves for estimated ES sensitivity parameters under different population sizes of children under 5 years old ( $N_c$ ) in a single patch setting. ....                                                         | 24 |
| Fig S12. Proportion of each detection pattern (%) against national ES population coverage for 6 scenarios. ....                                                                                                                        | 25 |
| Fig S13. Proportion of each detection pattern (%) including the no detection pattern against the number of ES-covered patches for 6 scenarios. ....                                                                                    | 25 |
| Fig S14. Sensitivity analysis of the patch-level ES population coverage, $p_c$ , for the ES-pop scenarios. ....                                                                                                                        | 26 |
| Fig S15. Sensitivity analysis of the patch-level ES population coverage, $p_c$ , for the ES-LBC scenarios. ....                                                                                                                        | 27 |



# 1 Supplementary Methods

## 1.1 Data

We collated the population size data from the WorldPop [1] at 100m spatial resolution for 5 bin age categories and created population size data for children under 5 years old and for all ages in South Africa. We aggregated the population data into a 20km spatial resolution (precisely 21.31km x 19.74km), resulting in 3,193 patches. We removed patches with less than 100 children under 5 years old and finally obtained 1502 patches (Fig S1). Through this process, we removed 0.61% population of children under 5 years old. We kept patch spatial resolution constant for all patches so that ES-covered areas in each patch were fixed. We applied the same procedure to create the population data for children under 5 years old in Mozambique at the same resolution.

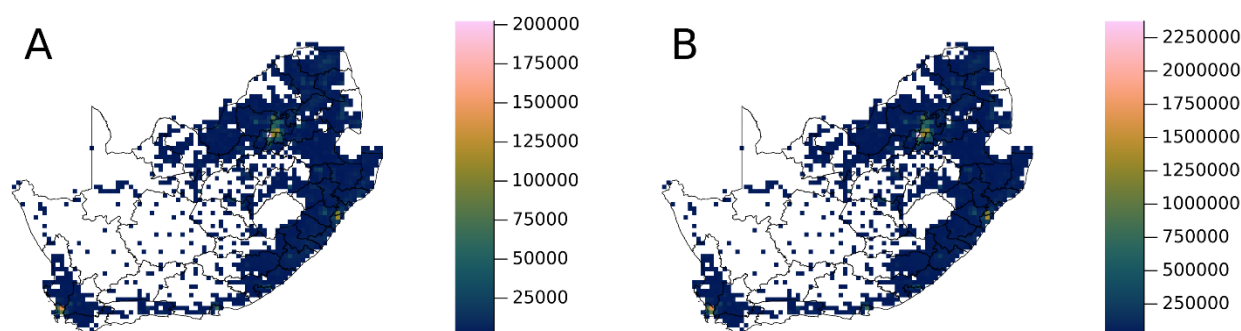

**Fig S1. Heatmap of population size in South Africa.** (A) Children under 5 years old and (B) All ages. Patches with <100 children under 5 years old were removed from the analysis.

We collated the district-level vaccination coverage from the Expanded Programme on Immunisation National Coverage Survey Report 2020 in South Africa [2]. We summarised the coverage of oral polio vaccine (OPV) and hexavalent vaccine (HEXA) including inactivated polio vaccine (IPV) for each district in Table S1 with the district-level effective immunisation proportions (EIPs), which were calculated using the equation described in the main text. We visualised the district-level EIPs in Fig S2.

**Table S1. OPV coverage (%), HEXA coverage (%) and effective immunisation proportion (EIP, %) by districts in South Africa.**

| District                  | Sample size | OPV0 <sup>a</sup> | OPV1  | HEXA1 <sup>b</sup> | HEXA2 | HEXA3 | HEXA4 | EIP <sup>c</sup> |
|---------------------------|-------------|-------------------|-------|--------------------|-------|-------|-------|------------------|
| West Coast                | 74          | 97.3              | 95.9  | 97.3               | 97.3  | 89.2  | 82.4  | 94.3             |
| Cape Winelands            | 179         | 96.1              | 94.4  | 95.0               | 94.4  | 93.9  | 88.8  | 92.8             |
| Overberg                  | 143         | 97.2              | 94.4  | 94.4               | 94.4  | 96.5  | 84.6  | 94.3             |
| Eden                      | 121         | 96.7              | 88.4  | 95.9               | 95.0  | 90.9  | 89.3  | 93.3             |
| Central Karoo             | 33          | 100.0             | 100.0 | 100.0              | 100.0 | 100.0 | 97.0  | 98.0             |
| Namakwa                   | 27          | 100.0             | 96.3  | 96.3               | 100.0 | 100.0 | 92.6  | 97.9             |
| Pixley ka Seme            | 32          | 93.8              | 87.5  | 90.6               | 81.3  | 78.1  | 68.8  | 85.0             |
| Z F Mgcawu                | 61          | 98.4              | 98.4  | 96.7               | 100.0 | 96.7  | 83.6  | 97.3             |
| Frances Baard             | 200         | 99.0              | 98.0  | 99.0               | 99.5  | 98.5  | 90.5  | 97.3             |
| Cacadu                    | 348         | 97.1              | 95.4  | 96.0               | 96.3  | 94.8  | 87.6  | 94.1             |
| Amathole                  | 220         | 98.6              | 96.4  | 97.7               | 96.8  | 95.0  | 86.4  | 95.1             |
| Chris Hani                | 79          | 98.7              | 92.4  | 92.4               | 97.5  | 93.7  | 87.3  | 95.0             |
| Joe Gqabi                 | 110         | 95.5              | 92.7  | 92.7               | 91.8  | 93.6  | 81.8  | 92.0             |
| O.R.Tambo                 | 372         | 95.4              | 90.3  | 86.6               | 87.9  | 84.4  | 76.3  | 85.6             |
| Xhariep                   | 81          | 97.5              | 95.1  | 96.3               | 92.6  | 93.8  | 76.5  | 93.8             |
| Lejweleputswa             | 285         | 98.6              | 97.9  | 99.3               | 97.9  | 97.9  | 87.4  | 96.6             |
| Thabo Mofutsanyane        | 50          | 100.0             | 96.0  | 98.0               | 98.0  | 98.0  | 86.0  | 95.8             |
| Fezile Dabi               | 128         | 91.4              | 81.3  | 82.0               | 82.8  | 82.8  | 82.0  | 81.2             |
| Ugu                       | 187         | 97.3              | 96.8  | 97.9               | 98.4  | 96.3  | 88.8  | 96.1             |
| Umgungundlovu             | 60          | 96.7              | 96.7  | 93.3               | 96.7  | 96.7  | 83.3  | 94.5             |
| Uthukela                  | 700         | 95.3              | 93.7  | 93.3               | 92.7  | 92.7  | 80.6  | 91.0             |
| Umzinyathi                | 205         | 97.6              | 97.6  | 97.1               | 96.6  | 95.6  | 83.9  | 94.6             |
| Amajuba                   | 470         | 96.0              | 95.3  | 95.3               | 93.6  | 93.8  | 83.2  | 92.8             |
| Zululand                  | 399         | 96.5              | 95.5  | 95.0               | 95.2  | 93.7  | 77.9  | 92.7             |
| Umkhanyakude              | 243         | 97.1              | 95.5  | 93.8               | 94.2  | 93.8  | 87.2  | 92.2             |
| Uthungulu                 | 986         | 92.4              | 92.3  | 92.7               | 91.7  | 91.3  | 82.8  | 90.3             |
| iLembe                    | 359         | 79.9              | 78.6  | 76.9               | 76.3  | 76.6  | 72.4  | 75.4             |
| Gert Sibande              | 284         | 99.3              | 98.2  | 98.2               | 98.2  | 97.9  | 84.9  | 95.9             |
| Nkangala                  | 328         | 90.2              | 87.5  | 88.7               | 88.4  | 86.9  | 78.0  | 86.5             |
| Ehlanzeni                 | 396         | 93.2              | 92.9  | 89.9               | 89.9  | 89.6  | 81.1  | 87.9             |
| Mopani                    | 680         | 93.5              | 91.5  | 91.9               | 92.1  | 90.4  | 81.6  | 89.9             |
| Vhembe                    | 589         | 93.0              | 92.5  | 92.2               | 91.9  | 90.8  | 82.0  | 90.0             |
| Capricorn                 | 493         | 87.4              | 85.8  | 86.0               | 86.6  | 85.8  | 71.6  | 84.4             |
| Waterberg                 | 111         | 96.4              | 95.5  | 96.4               | 94.6  | 92.8  | 73.9  | 93.1             |
| Bojanala                  | 299         | 94.3              | 91.6  | 93.0               | 91.3  | 90.6  | 83.3  | 90.3             |
| Ngaka Modiri Molema       | 484         | 97.1              | 96.7  | 94.8               | 95.2  | 93.2  | 82.0  | 92.8             |
| Dr Ruth Segomotsi Mompati | 106         | 97.2              | 97.2  | 97.2               | 95.3  | 95.3  | 84.9  | 94.4             |
| Dr Kenneth Kaunda         | 210         | 95.7              | 94.8  | 94.8               | 93.3  | 91.9  | 83.8  | 92.1             |
| Sedibeng                  | 514         | 94.6              | 92.6  | 94.2               | 93.8  | 93.0  | 84.0  | 91.9             |
| Sisonke                   | 597         | 96.0              | 95.1  | 94.6               | 94.1  | 94.5  | 87.1  | 92.8             |
| Alfred Nzo                | 271         | 98.2              | 95.9  | 96.7               | 96.7  | 95.6  | 83.4  | 94.4             |

|                      |      |       |       |       |       |       |       |      |
|----------------------|------|-------|-------|-------|-------|-------|-------|------|
| John Taolo Gaetsewe  | 5    | 100.0 | 100.0 | 100.0 | 100.0 | 100.0 | 100.0 | 98.1 |
| Sekhukhune           | 345  | 92.8  | 89.6  | 91.6  | 91.9  | 90.7  | 82.6  | 89.8 |
| West Rand            | 382  | 97.4  | 96.9  | 97.4  | 96.1  | 95.8  | 90.1  | 94.9 |
| Buffalo City         | 211  | 98.6  | 95.3  | 95.3  | 95.3  | 94.8  | 86.3  | 93.2 |
| City of Cape Town    | 101  | 97.0  | 98.0  | 97.0  | 97.0  | 94.1  | 90.1  | 94.7 |
| Ekurhuleni           | 890  | 97.1  | 96.1  | 96.6  | 95.5  | 94.9  | 86.9  | 94.1 |
| eThekweni            | 887  | 94.0  | 92.6  | 92.4  | 91.7  | 91.8  | 83.8  | 90.3 |
| City of Johannesburg | 1710 | 97.0  | 96.4  | 95.6  | 95.3  | 94.8  | 87.8  | 93.4 |
| Mangaung             | 187  | 98.9  | 97.9  | 97.3  | 98.4  | 97.9  | 87.7  | 96.2 |
| Nelson Mandela Bay   | 326  | 94.5  | 93.3  | 93.9  | 92.9  | 92.0  | 86.5  | 91.5 |
| City of Tshwane      | 621  | 98.9  | 96.3  | 96.5  | 95.3  | 95.8  | 86.5  | 94.5 |

<sup>a</sup> OPV: Oral polio vaccine

<sup>b</sup> HXA: Hexavalent vaccine including diphtheria, tetanus, acellular pertussis, Haemophilus influenzae type b, inactivated polio vaccine (IPV), and hepatitis B vaccines.

<sup>c</sup> EIP: Effective immunisation proportion.

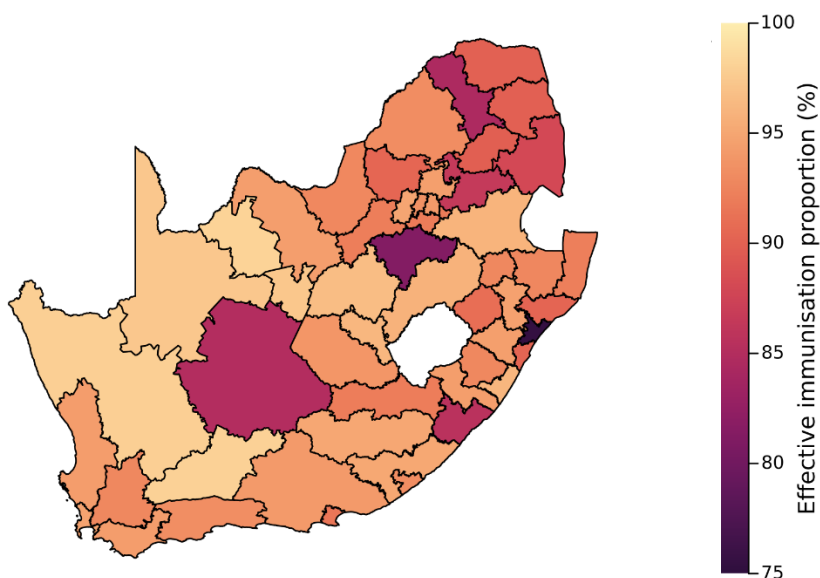

**Fig S2. Estimated effective immunisation proportion by districts in South Africa, 2020.**

## 1.2 Ethical statement

This study was assessed by the Research Governance & Integrity Office at the London School of Hygiene & Tropical Medicine as not requiring ethical approval due to its study design as a secondary data analysis on 9 May 2023 (MSc ethics reference number: 29004). The location and population size covered by each wastewater plant were provided by the National Institute of Communicable Diseases (NICD) in South Africa. All other data are publicly available.

### 1.3 Modelling framework

To assess the early detection ability of environmental surveillance (ES) over acute flaccid paralysis (AFP) surveillance, we constructed the stochastic spatiotemporal model among unimmunised children under 5 years old considering the detection process through the AFP surveillance and ES (Fig S3). We utilised South Africa as a case study of a non-endemic country and assumed a single introduction of a patient with wild poliovirus serotype 1 (WPV1). Following other modelling studies on polio [3–5], our model comprises three components: transmission model, AFP surveillance model and ES model (Fig S3), which will be explained in later sections. We used the detection patterns and first detection timing by ES and AFP surveillance as outcomes to quantify the early detection ability while we varied the number of ES-covered patches. We prepared three importation risk distributions and two ES site layout strategies, totalling six scenarios, to account for limited knowledge of importation risks (Fig 1).

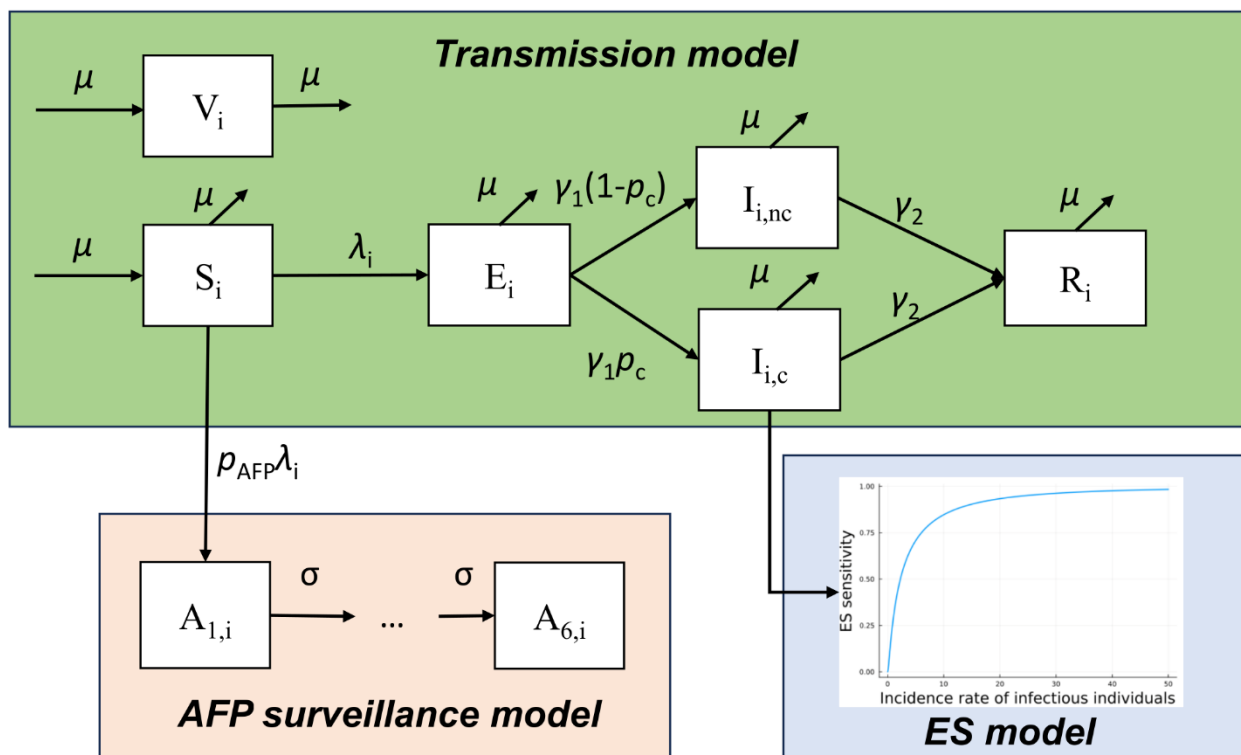

**Fig S3. Schematic representation of our model, comprising of three parts: transmission model, AFP surveillance model and ES model.** Each compartment is defined as follows: S, susceptible population; E, latent population; I, infectious population; R, recovered population; V, immunised population; and  $A_1$  through  $A_6$ , population who are developing AFP. ES sensitivity is dependent on the incidence rate of infectious polio patients. The subscript of  $i$  corresponds to the location. Abbreviations: ES, environmental surveillance; AFP, acute flaccid paralysis.

#### 1.3.1 Transmission model

We employed the stochastic spatiotemporal SEIR model to describe the transmission dynamics. The SEIR model simulates the process in which susceptible individuals (S) get infected, passing through a latent period (E) and infectious period (I), and then recover from infection (R). We only considered unimmunised children under 5 years old since most reported patients with AFP were

within this age group [6]. We assumed no waning of immunity from vaccination or natural infection. Considering our simulation length (i.e. 3 years), we introduced the birth and removal rate ( $\mu$ ) to reflect the population dynamics. We classified infectious compartments into the one covered by the ES ( $I_c$ ) and the one not covered by the ES ( $I_{nc}$ ) but assumptions on infectiousness did not differ between groups.

The force of infection at patch  $i$  at day  $t$  ( $\lambda_{i,t}$ ) corresponds to the rate at which susceptible individuals at patch  $i$  at day  $t$  get infected and is described by

$$\lambda_{i,t} = \frac{\beta}{N_{i,c}} \left[ (1 - \alpha)(I_{i,c,t} + I_{i,nc,t}) + \alpha \sum_{j \neq i} \pi_{ji}(I_{j,c,t} + I_{j,nc,t}) \right], \quad (S1)$$

where  $\beta$  corresponds to the transmission rate, and  $\alpha$  corresponds to the travelling rate between patches, which represents the proportion of travellers per day from one patch. The population aged under 5 years old at patch  $i$  is denoted as  $N_{i,c}$ . It is noted that immunised populations ( $V_i$ ) contributed to herd immunity and its population size was given by  $N_{i,c}$  multiplied by the EIP at patch  $i$  ( $EIP_i$ ). Then, the initial susceptible population at patch  $i$  ( $S_i$ ) was given by  $N_{i,c} (1 - EIP_i)$ , and the effective reproduction number at patch  $i$  at the beginning of the simulation ( $R_{e,i}$ ) was given by the product of the basic reproduction number ( $R_0 = \beta/\gamma_2$ ) and the EIP at patch  $i$ .

The second term of Equation S1 corresponds to the hazard from other patches, considering the travelling rate ( $\alpha$ ) and moving rates of travellers from origin  $j$  to destination  $i$  among all travellers moving from patch  $j$  ( $\pi_{ji}$ ). We adopted the frequency-dependent model for between-patch transmission, which was theoretically investigated [7,8], while another modelling study on poliovirus employed density-dependent transmission [5]. We used the radiation model to approximate moving rates ( $\pi_{ji}$ ):

$$\pi_{ij} = \frac{N_{i,c} N_{j,c}}{(N_{i,c} + N_{ij,c}^S)(N_{i,c} + N_{j,c} + N_{ij,c}^S)}, \quad (S2)$$

where  $N_{ij,c}^S$  denotes the aggregated population aged under 5 years old within the circular area with a radius extending from patch  $i$  to patch  $j$ , centred at patch  $i$  but excluding the source and destination population. The histogram and heatmap of moving rates ( $\pi_{ij}$ ) of the top 3 populous patches are shown in Fig S4. The previous study suggested in the context of polio disease, the radiation model not only outperformed the gravity model [9–11], but also excelled when compared to the gravity model calibrated to mobile phone data [9].

We adopted the discrete Markov process with daily time steps for our stochastic simulations. Transition events, effects and sampling ways of new states were summarised in Table S2.

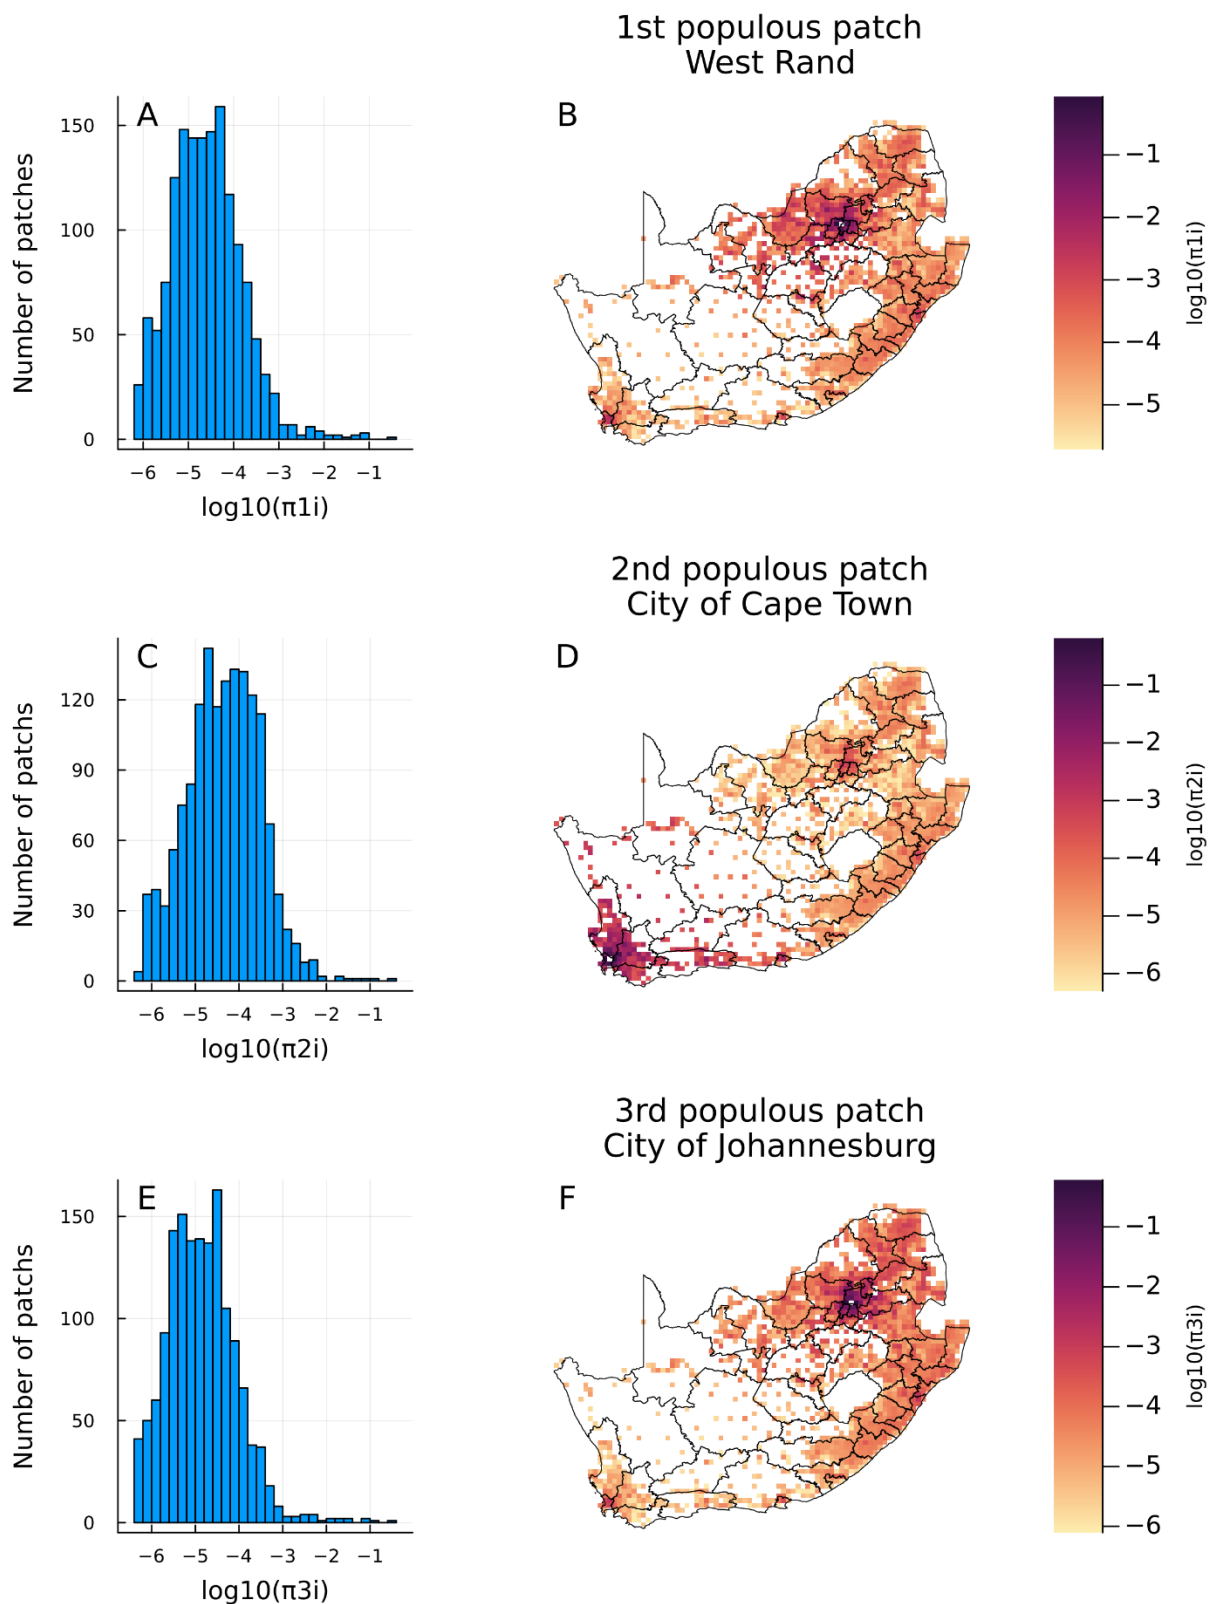

**Fig S4. Moving rates from origin  $i$  to destination  $j$  ( $\pi_{ij}$ ) approximated by the radiation model for the three most populous patches. (A, C, E) Histogram of  $\pi_{ij}$  and (B, D, E) heatmap of  $\pi_{ij}$  with colour bar values on a  $\log_{10}$  scale for (A, B) West Rand, (C, D) City of Cape Town and (E, F) City of Johannesburg.**

**Table S2. Discrete Markov process for each time step.**

| Event (patch $i$ )                                                  | Effect                                                                                                                                       | Sampling way                                                                          |
|---------------------------------------------------------------------|----------------------------------------------------------------------------------------------------------------------------------------------|---------------------------------------------------------------------------------------|
| Birth of susceptible individuals                                    | $(S_{i,t+1}) \leftarrow (S_{i,t} + Z_{i,t}^{(N_{i,u})})$                                                                                     | $Z_{i,t}^{(N_{i,u})} \sim \text{Binomial}(N_{i,u}, 1 - e^{-\mu})$                     |
| Removal of susceptible individuals because of age eligibility       | $(S_{i,t+1}) \leftarrow (S_{i,t} - Z_{i,t}^{(S_{i,t})})$                                                                                     | $Z_{i,t}^{(S_{i,t})} \sim \text{Binomial}(S_{i,t}, 1 - e^{-\mu})$                     |
| Infection of susceptible individuals                                | $(S_{i,t+1}, E_{i,t+1}) \leftarrow (S_{i,t} - Z_{i,t}^{(S_{i,t}, E_{i,t})}, E_{i,t} + Z_{i,t}^{(S_{i,t}, E_{i,t})})$                         | $Z_{i,t}^{(S_{i,t}, E_{i,t})} \sim \text{Binomial}(S_{i,t}, 1 - e^{-\lambda_{i,t}})$  |
| New individuals who will develop AFP                                | $(A_{1,i,t+1}) \leftarrow (A_{1,i,t} + Z_{i,t}^{(A_{1,i,t})})$                                                                               | $Z_{i,t}^{(A_{1,i,t})} \sim \text{Binomial}(Z_{i,t}^{(S_{i,t}, E_{i,t})}, p_{AFP})$   |
| Removal of latent individuals because of age eligibility            | $(E_{i,t+1}) \leftarrow (E_{i,t} - Z_{i,t}^{(E_{i,t})})$                                                                                     | $Z_{i,t}^{(E_{i,t})} \sim \text{Binomial}(E_{i,t}, 1 - e^{-\mu})$                     |
| Becoming infectious                                                 | $(E_{i,t+1}, I_{i,t+1}) \leftarrow (E_{i,t} - Z_{i,t}^{(E_{i,t}, I_{i,t})}, I_{i,t} + Z_{i,t}^{(E_{i,t}, I_{i,t})})$                         | $Z_{i,t}^{(E_{i,t}, I_{i,t})} \sim \text{Binomial}(E_{i,t}, 1 - e^{-\gamma_1})$       |
| Removal of infected individuals because of age eligibility          | $(I_{i,t+1}) \leftarrow (I_{i,t} - Z_{i,t}^{(I_{i,t})})$                                                                                     | $Z_{i,t}^{(I_{i,t})} \sim \text{Binomial}(I_{i,t}, 1 - e^{-\mu})$                     |
| Recovery from infection                                             | $(I_{i,t+1}, R_{i,t+1}) \leftarrow (I_{i,t} - Z_{i,t}^{(I_{i,t}, R_{i,t})}, R_{i,t} + Z_{i,t}^{(I_{i,t}, R_{i,t})})$                         | $Z_{i,t}^{(I_{i,t}, R_{i,t})} \sim \text{Binomial}(I_{i,t}, 1 - e^{-\gamma_2})$       |
| Removal of recovered individuals because of age eligibility         | $(R_{i,t+1}) \leftarrow (R_{i,t} - Z_{i,t}^{(R_{i,t})})$                                                                                     | $Z_{i,t}^{(R_{i,t})} \sim \text{Binomial}(R_{i,t}, 1 - e^{-\mu})$                     |
| Progression of the incubation period of AFP from stage $k$ to $k+1$ | $(A_{k,i,t+1}, A_{k+1,i,t+1}) \leftarrow (A_{k,i,t} - Z_{i,t}^{(A_{k,i,t}, A_{k+1,i,t})}, A_{k+1,i,t} + Z_{i,t}^{(A_{k,i,t}, A_{k+1,i,t})})$ | $Z_{i,t}^{(A_{k,i,t}, A_{k+1,i,t})} \sim \text{Binomial}(A_{k,i,t}, 1 - e^{-\sigma})$ |

<sup>a</sup>  $N_{i,u}$  denotes unvaccinated individuals at patch  $i$ , calculated as the product of population aged under 5 years old and effective immunisation proportion at patch  $i$ .

We estimated the infectious period ( $1/\gamma_2$ ) using the proportion of infected individuals shedding any amount of virus over time, which was provided by expert opinions [12]. Formally, the time course of infectiousness can be obtained by the product of the proportion of individuals shedding any amount of virus and non-linear transformation of the amount of virus shedding given a person excretes the virus each day since infection [12]. Since we do not know the functional form for the latter data, we regarded the first one as the infectiousness for simplicity.

Since the compartment model implicitly assumes the transition process from one compartment to another follows the exponential distribution, the distribution of infectiousness over time can be described as the convolution of two exponential distributions:

$$f(t) = \int_0^t \gamma_1 e^{-\gamma_1(t-s)} \gamma_2 e^{-\gamma_2 s} ds = \frac{\gamma_1 \gamma_2}{\gamma_2 - \gamma_1} (e^{-\gamma_1 t} - e^{-\gamma_2 t}), \quad (\text{S3})$$

where the reciprocal,  $1/\gamma_1$ , corresponds to the mean incubation period and is assumed to be 4 day, and  $1/\gamma_2$  corresponds to the mean infectious period. We minimised the Kullback-Leibler divergence between the observed distribution and  $f(t)$ , estimating  $1/\gamma_2$  to be 15.02 days. The fitted curve is shown in Fig S5.

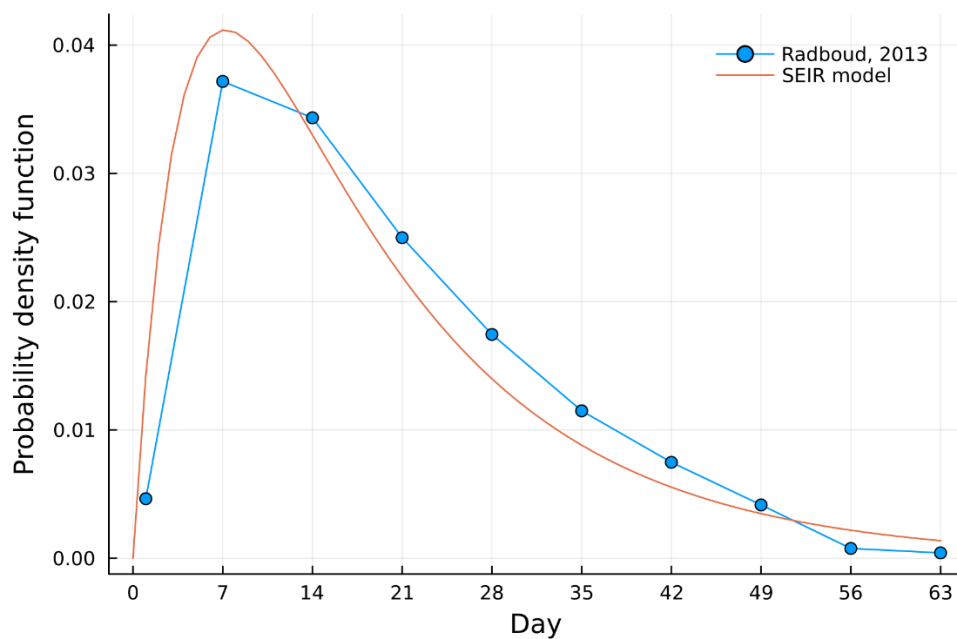

**Fig S5.** The proportion of individuals excreting the poliovirus regardless of the amount of virus shedding over time, which was scaled to be one for the probability density function and the fitted probability density function.



### 1.3.2 AFP surveillance model

We assumed the probability of developing AFP given infection with poliovirus to be 1/200, which was denoted as  $p_{AFP}$ . Patients developing AFP are correctly reported if they successfully undergo the following process: seeking healthcare, being tested, and getting a positive result. We denoted  $P_H$ ,  $P_{AFP, sample}$ , and  $P_{AFP, test}$  as the probability of each process. Then, the number of reported patients with AFP at patch  $i$  at time  $t$ ,  $O_{i,t}$ , was described as

$$O_{i,t} \sim \text{Binomial} \left( Z_{i,t}^{(A_{5,i,t}, A_{6,i,t})}, P_H P_{AFP, sample} P_{AFP, test} \right), \quad (S4)$$

where the number of individuals who newly develop AFP at patch  $i$  at day  $t$  is denoted as

$$Z_{i,t}^{(A_{5,i,t}, A_{6,i,t})}.$$

The incubation period of developing AFP was assumed to be 16.5 days [13,14] and we prepared 6 compartments with transition rates of 0.329 days<sup>-1</sup> to be aligned with the incubation period distribution [5]. The number of compartments and transition rates were estimated in the previous study [5] by fitting an Erlang distribution to 36 independent data intervals from poliovirus exposure to the onset of AFP. In the present study, we did not consider a delay in medical consultations, conducting tests and notifications to authorities. These processes usually take time [15] and should be accounted for when results are interpreted.

### 1.3.3 Environmental surveillance model

There are limited empirical data to compare the incidence of poliovirus against the probability of a positive ES sample, which is a required parameter in this analysis. Instead, we opted to assume that ES sensitivity for poliovirus was comparable to that observed for COVID-19, and used the wastewater surveillance data in the US, published by Fuqing Wu et al. [16]. The data for COVID-19 is more amenable to analysis because of the intensity of clinical testing for SARS-CoV-2 and the (comparatively) low proportion of asymptomatic infections. To ensure the consistent quality of ES in each sampling site for estimation, we used sampling sites with both positive and negative samples, where daily newly reported cases on the day with positive samples were consistently higher than on the day with negative samples. Finally, 27 out of 353 sampling sites were eligible for the estimation.

We employed the log-normal distribution to estimate the dose-response curve for the ES sensitivity against the incidence rate of COVID-19 (thus also of poliovirus infection). Let  $x_{i,t}$  be the number of newly reported COVID-19 cases at sampling site  $i$  on day  $t$ ,  $y_{i,t}$  be the indicator variable for an observed positive sample at sampling site  $i$  on day  $t$ , and  $p_{i,t}$  be the probability of detecting a positive sample at site  $i$  on day  $t$ . We minimized the following likelihood function to estimate the parameters of the lognormal distribution ( $\mu_{ES}$  and  $\sigma_{ES}$ ):

$$L = \prod_i \prod_t p_{i,t}^{y_{i,t}} (1 - p_{i,t})^{1 - y_{i,t}}, \quad (S5)$$

$$p_{i,t} = G \left( 100,000 \frac{x_{i,t}}{N_{i,FW}}; \mu_{ES}, \sigma_{ES} \right) = \Phi \left( \frac{\log \left( 100,000 \frac{x_{i,t}}{N_{i,FW}} \right) - \mu_{ES}}{\sigma_{ES}} \right)$$

where  $G$  denotes the cumulative density function of the log-normal distribution,  $N_{i,FW}$  denotes the population in the state with sampling site  $i$ , which was given in Fuqing Wu et al. [16], and  $\Phi$

corresponds to the cumulative density function of the standard normal distribution. We obtained 0.818 for  $\mu_{ES}$  and 1.45 for  $\sigma_{ES}$ .

The estimated parameters here will be inappropriate in terms of differences in the amount and length of virus shedding between SARS-CoV-2 and poliovirus in addition to differences in diagnostics for the detection of virus. In the main text, we conducted the sensitivity analysis ranging the ES sensitivity from 10 times higher to 10 times lower. We multiplied  $1/k$  for previous data to obtain parameters for  $k$  times higher ES sensitivity. The dose-response curves for those ES sensitivity parameters are shown in Fig S6.  $\sigma_{ES}$  was estimated to be constant across different ES sensitivity assumptions and  $\mu_{ES}$  was estimated to be 3.121, 1.917, -0.281 and -1.485 for 10 times lower, 3 times lower, 3 times higher, and 10 times higher ES sensitivity, respectively.

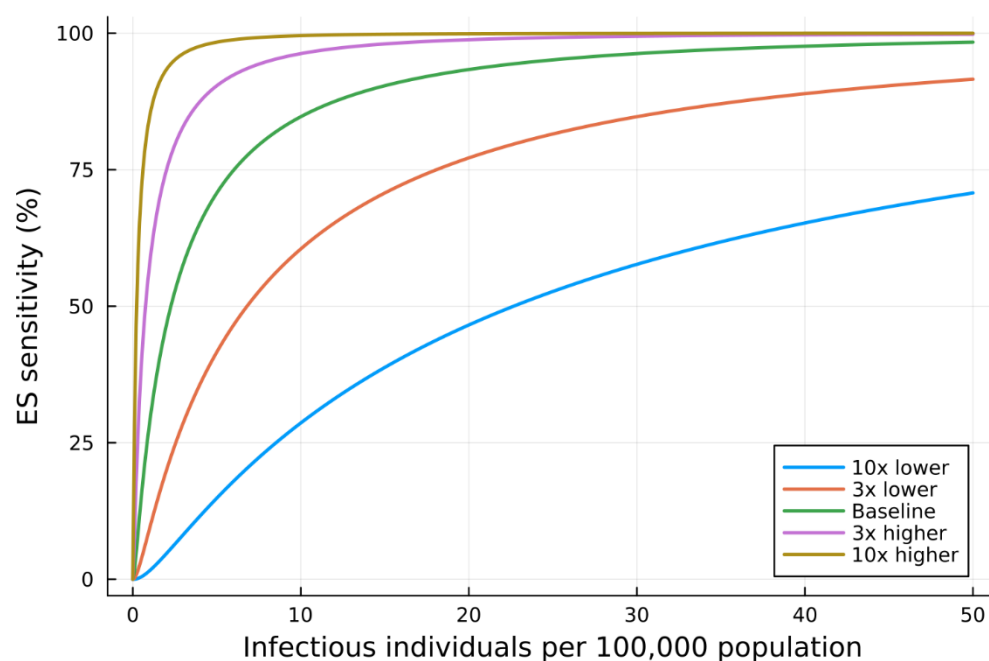

**Fig S6. Dose-response curve for the ES sensitivity parameter against the number of infectious individuals per 100,000 population in a single patch.**

We modelled the detection process through ES as the binomial process in our simulation study. Let  $n_{i,t}$  be the indicator variable for conducting environmental sampling at patch  $i$  at day  $t$  (e.g. given monthly sampling,  $n_{i,t}$  takes 1 on a single day, and takes 0 for the remaining days within a month), and  $P_{ES, test}$  be the test sensitivity given a collected sample contains a detectable level of virus. The number of polio-positive samples in wastewater ( $w_{i,t}$ ) is given by

$$w_{i,t} \sim \text{Binomial} \left( n_{i,t}, G \left( 100,000 \frac{I_{i,c,t}}{N_i p_c}; \mu_{ES}, \sigma_{ES} \right) P_{ES, test} \right). \quad (S6)$$

It is noted that in each patch,  $p_c\%$  of the population was assumed to be covered by the ES, and we separately considered the infectious individuals covered by ES ( $I_{i,c,t}$ ) or not ( $I_{i,nc,t}$ ) in the compartment model. Here  $N_i$  denotes the population of all ages at patch  $i$  (not limited to children under 5 years old).

### 1.3.4 Importation risk distributions

Importation risk at patch  $i$  refers to the probability that WPV1 is introduced to that specific patch and importation risk distribution refers to the distribution of importation risk across patches. We considered three importation risk distributions, which are denoted as IMP-POP, IMP-AIR, and IMP-LBC.

The IMP-POP refers to the ‘Population size’-based importation risk distribution and assumes importation risk is proportional to the population size of each patch. Let  $r_i$  be the importation risk at patch  $i$  for the IMP-POP scenario and be described as

$$r_i = \frac{N_{i,c}}{\sum_i N_{i,c}}, \quad (S7)$$

where  $N_{i,c}$  denotes the population size of children aged under 5 years old at patch  $i$ .

The IMP-AIR refers to the ‘International airport’-based importation risk distribution and assumes importation risk is proportional to international inbound travel volume in 2019 and further considers mobilisation from airports, which was approximated by the radiation model given in Equation S2. Without considering mobilisation from airports, importation risks would be too confined to a few patches, which are sometimes very rural areas and we did not think that importation risk distribution is a realistic one. South Africa holds three international airports and their international inbound travel volumes in 2019 were 4,342,611 for O.R. Tambo International Airport, 1,156,996 for Cape Town International Airport, and 188,243 for King Shaka International Airport (Fig 1D).

We denote  $l_1$ ,  $l_2$  and  $l_3$  as the location of a patch with O.R. Tambo International Airport, Cape Town International Airport, and King Shaka International Airport, respectively. Let  $w_i$  be the proportion of the inbound travel volume at patch  $i$  with international airport  $i$ . The importation risk at patch  $i$  for the IMP-AIR is described as the average of moving rates from three international airports weighted by their inbound travel volumes:

$$r_i = w_{l_1}\pi_{(l_1)i} + w_{l_2}\pi_{(l_2)i} + w_{l_3}\pi_{(l_3)i}. \quad (S8)$$

The IMP-LBC refers to the ‘Land border crossing’-based importation risk distribution and assumes importation risk is proportional to travelling volume from Mozambique. Here, we assumed poliovirus was circulating in Mozambique and importation from Mozambique to South Africa happened via land border crossing. Since mobilisation volume data between Mozambique and South Africa is not available, we approximated those mobilisations with the radiation model.

The probability of the presence of poliovirus in patch  $j$  in Mozambique was assumed to be proportional to the population size of children under 5 years old, and the movement from patch  $j$  in Mozambique to patch  $i$  in South Africa is given by the radiation model between the two countries. The importation risk at patch  $i$  in South Africa for the IMP-LBC is described as

$$r_i = \frac{\sum_{j \in S_{MOZ}} \alpha_M \pi_{ji} N_{j,c}}{\sum_{k \in S_{ZAF}} \sum_{j \in S_{MOZ}} \alpha_M \pi_{jk} N_{k,c}} = \frac{\sum_{j \in S_{MOZ}} \pi_{ji} N_{j,c}}{\sum_{k \in S_{ZAF}} \sum_{j \in S_{MOZ}} \pi_{jk} N_{k,c}}, \quad (S9)$$

where  $S_{MOZ}$  and  $S_{ZAF}$  represent the set of patches in Mozambique and South Africa, respectively. The travelling rate from Mozambique to South Africa ( $\alpha_M$ ) would be different from the travelling rate between patches in South Africa ( $\alpha$ ) but is cancelled out in Equation S9.

The importation risk distributions explained above are visualised in Fig S7.

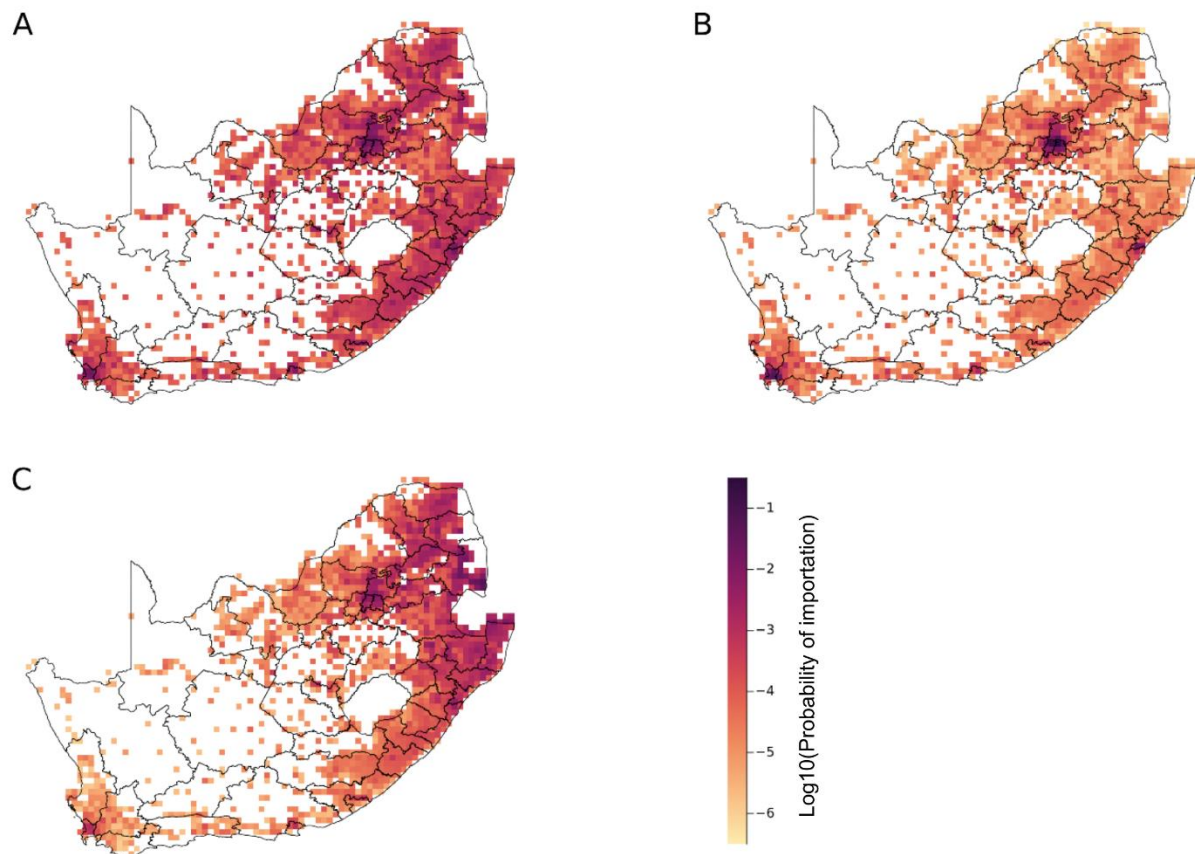

**Fig S7. Importation risk distributions in a log<sub>10</sub> scale (A) for IMP-POP, (B) IMP-AIR, and (C) IMP-LBC.**

### 1.3.5 ES site layout strategies and a patch-level ES population coverage ( $p_c$ )

ES site layout strategy determines a sequence of which patches are covered by the ES when we increase the number of ES-covered patches. We considered two ES site layout strategies: ES-POP and ES-LBC. The ES-POP refers to the 'Population size'-based ES site layout strategy, and assumes the ES is implemented in the descending order of population size of each patch. Hence, this strategy can cover the largest population size by the ES given the same number of ES-covered patches.

The ES-LBC refers to the 'Land border crossing importation risk'-based ES site layout strategy, and assumes the ES is first implemented in a patch with a high importation risk via land border crossing from Mozambique. The importation risk from Mozambique is given as the same in Equation S9. The motivation to prepare the ES-LBC is to quantify the effectiveness of the strategic positioning of the ES sites against the high importation risks in rural areas. The animations of the incremental ES implementation from a single patch to all patches were prepared for both ES-POP and ES-LBC in gif-files (S1-2 Video). It is noted that the maximum national ES population coverage was set at 25% since we assumed the ES-population coverage in each patch (called a patch-level ES population coverage,  $p_c$ ) to be 25%, which reason is explained below.

We aimed for our simulated ES site layout under the ES-POP to be closely aligned with the observed one. The ES site is generally prioritised to be placed in populous areas in the real-world

setting. To quantify the similarity between simulated and observed ES layouts in South Africa, we first calculated the observed national and district-level ES population coverage (Table S3). Then, we varied a patch-level ES population coverage ( $p_c$ ) fixing the simulated national ES population coverage to be the same as the observed one, and descriptively compared the simulated number of districts with ES sites and the corresponding district-level ES population coverage with the observed ones (Table S4).

We calculated the observed national and district-level ES population coverage using the location and ES-covered population of each wastewater plant, which was provided by the National Institute of Communicable Diseases in South Africa as of 27 November 2023. The ES-covered population was missing for Rooiwal Eastern and Daspoort wastewater plants and we imputed the median ES-covered population size of 350,000. We finally estimated the observed national ES population coverage in South Africa to be 11.3% (Table S3). The median and mean of the district-level ES population coverage among districts with ES sites were 30.6% and 22.5%, respectively.

We simulated the ES layout varying the patch-level ES population coverage ( $p_c$ ) while fixing the simulated national ES population coverage to be the observed one of 11.3% (Table S4). When we set  $p_c$  at 100%, the ES sites were too concentrated and simulated district-level ES population coverages were much higher than observed ones. We chose  $p_c$  to be 25% for the main analysis considering the dispersion of ES sites and district-level ES population coverages (Table S4 and Fig S8).

**Table S3. Approximated ES-covered population size in districts with ES sites in South Africa as of 27 November 2023.**

| Province        | District             | District-level population size | Wastewater plant name | ES-covered population size | District-level ES population coverage (%) |
|-----------------|----------------------|--------------------------------|-----------------------|----------------------------|-------------------------------------------|
| Eastern Cape    | Buffalo City         | 760840                         | East Bank             | 141000                     | 22.5                                      |
|                 |                      |                                | Gonubie               | 30400                      |                                           |
| Free State      | Mangaung             | 826621                         | Bloemspruit           | 350000                     | 66.5                                      |
|                 |                      |                                | Sterkwater            | 200000                     |                                           |
| Gauteng         | City of Johannesburg | 5540727                        | Northern              | 1200000                    | 46.0                                      |
|                 |                      |                                | Goudkoppies           | 500000                     |                                           |
|                 |                      |                                | Bushkoppies           | 850000                     |                                           |
|                 | City of Tshwane      | 3627986                        | Rooiwal Eastern       | NA                         | NA                                        |
|                 |                      |                                | Daspoort              | NA                         |                                           |
|                 | Ekurhuleni           | 3739653                        |                       | Hartebeesfontein           | 100000                                    |
| Olifantsfontein |                      |                                |                       | 100000                     |                                           |
| Vlakplaats      |                      |                                |                       | 200000                     |                                           |
| KwaZulu Natal   | eThekwini            | 3587907                        | Central               | 350000                     | 18.6                                      |
|                 |                      |                                | Northern              | 316425                     |                                           |
| North West      | Bojanala             | 1786678                        | Rustenburg            | 509000                     | 28.5                                      |
| Western Cape    | City of Cape Town    | 4436413                        | Borcherd's Quarry     | 380000                     | 18.9                                      |
|                 |                      |                                | Zandvliet             | 460000                     |                                           |

**Table S4. Observed and simulated district-level ES population coverage for the ES-POP varying the patch-level ES population coverages ( $p_c$ ) given the simulated national ES population coverage was fixed at the observed one (11.3%).**

| Province      | District             | Observed district-level ES population coverage (%) | Simulated district-level ES population coverage (%) |             |              |
|---------------|----------------------|----------------------------------------------------|-----------------------------------------------------|-------------|--------------|
|               |                      |                                                    | $p_c=1.0^a$                                         | $p_c=0.5^a$ | $p_c=0.25^a$ |
| Eastern Cape  | Buffalo City         | 22.5                                               |                                                     |             | 19.6         |
|               | Nelson Mandela Bay   | 0.0                                                |                                                     | 36.0        | 18.0         |
| Free State    | Mangaung             | 66.5                                               |                                                     |             | 15.2         |
|               | Thabo Mofutsanyane   | 0.0                                                |                                                     |             | 9.7          |
| Gauteng       | Ekurhuleni           | 10.7                                               |                                                     | 17.5        | 25.0         |
|               | City of Johannesburg | 46.0                                               | 37.1                                                | 50.0        | 25.0         |
|               | City of Tshwane      | 19.3                                               |                                                     | 12.4        | 21.2         |
|               | West Rand            | 0.0                                                | 56.8                                                | 28.4        | 23.6         |
|               | Sedibeng             | 0.0                                                |                                                     |             | 17.5         |
| Kwazulu Natal | eThekweni            | 18.6                                               | 64.2                                                | 32.1        | 22.2         |
|               | iLembe               | 0.0                                                |                                                     | 31.8        | 19.3         |
|               | Umgungundlovu        | 0.0                                                |                                                     |             | 8.8          |
|               | Amajuba              | 0.0                                                |                                                     |             | 9.1          |
| Western Cape  | City of Cape Town    | 18.9                                               | 36.7                                                | 40.7        | 22.8         |
|               | Cape Winelands       | 0.0                                                |                                                     |             | 12.5         |
| Limpopo       | Waterberg            | 0.0                                                |                                                     |             | 8.6          |
|               | Capricorn            | 0.0                                                |                                                     |             | 7.9          |
| Mpumalanga    | Ehlanzeni            | 0.0                                                |                                                     |             | 7.0          |
| North West    | Bojanala             | 28.5                                               |                                                     |             | 11.6         |
| Northern Cape | NA                   | NA                                                 |                                                     |             |              |

<sup>a</sup> Blank in those columns represents no ES-covered patches.



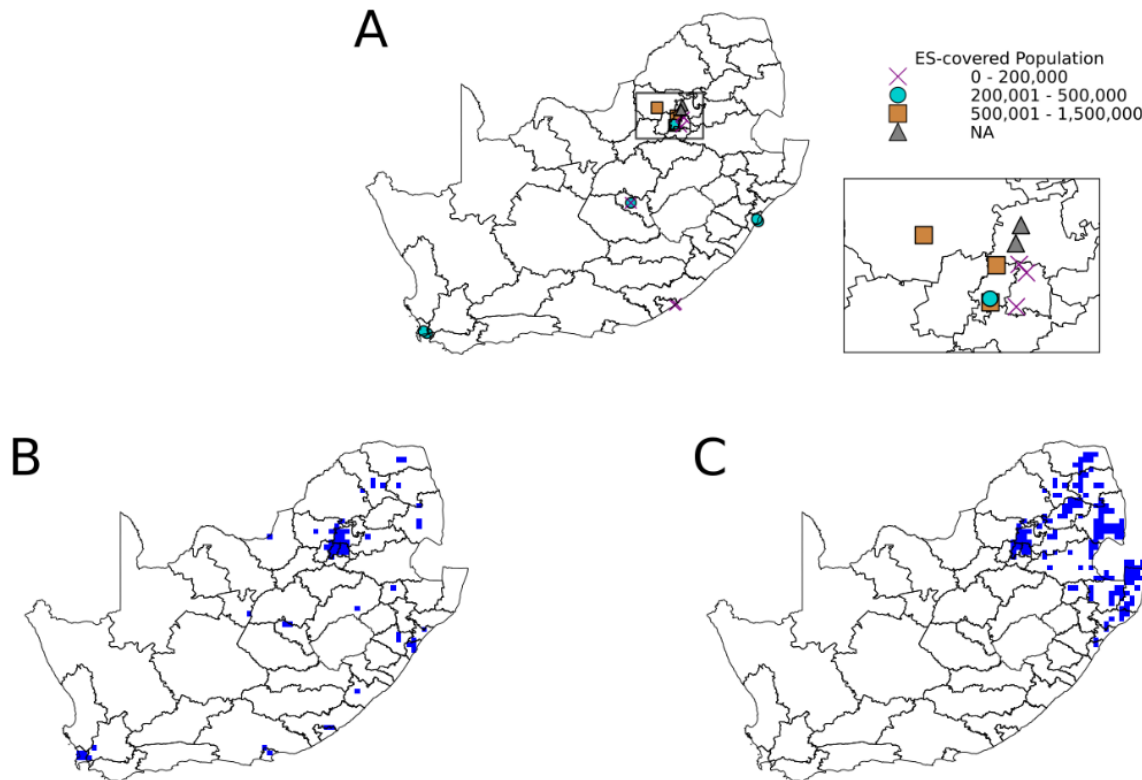

**Fig S8. Environmental surveillance (ES) location maps.** (A) Observed 17 ES sites in South Africa. Data points represent the location of observed ES sites, with each marker style indicating a specific range of ES-covered population sizes. The inset displays the expanded view of the areas with a high density of ES sites. (B, C) Simulated ES site layout when the simulated national ES population coverage was matched with the observed coverage given the patch-level ES population coverage was set at 25% (B) for ES-POP and (C) for ES-LBC. Blue squared areas represent patches with simulated ES sites. The number of ES-covered patches was 58 for ES-POP and 154 for ES-LBC.

### 1.3.6 Model parameter specification

Parameter values used in our simulations are summarised in

Table S5. We explained the rationale for the choice of several parameters.

We chose the basic reproduction number ( $R_0$ ) to be 14 based on the estimation for developing countries by Fine et al. 1999, which used age-stratified seroprevalence data [17]. This estimated value would be higher considering the current hygiene situation in South Africa. In our transmission model, the population who were successfully vaccinated and immunised were removed from the dynamics. We define the transmissibility accounting for the initial susceptible population as the effective reproduction number at the beginning of the simulation for South Africa,  $R_e(0)$ . We calculated  $R_e(0)$  by the product of  $R_0$  and EIP in each district and averaged them across districts weighted by the population size of each district, and we obtained 1.13 for  $R_e(0)$ .

Regarding the AFP surveillance-related parameters, the stool adequacy rate refers to two stool specimens of sufficient quantity for laboratory analysis, collected at least 24 hours apart, within 14



days after the onset of paralysis. The stool adequacy rate in South Africa was reported 53% from 2016 to 2019 [18]. The procedures of handling samples from polio patients in the laboratory in South Africa followed the WHO Polio Laboratory Manual and supplement [18] and its sensitivity of polio detection was reported to be 0.97 [19].

We assumed monthly sampling (every 30 days) from the ES site in each patch for our simulation. Most African countries use a grab method to collect samples from wastewater and the sampling frequency is often 30 days due to manual labour burdens [20]. Some countries adopted a composite method for the ES, allowing daily or weekly sampling. GPEI recommends daily or weekly sampling but also accepts monthly sampling [21].

**Table S5. Model Parameters used for our simulation.**

| Parameter description                                                                               | Values                     | Reference                                                               |
|-----------------------------------------------------------------------------------------------------|----------------------------|-------------------------------------------------------------------------|
| Per-dose vaccine effectiveness for IPV assessed by seroconversion                                   | 0.63                       | [22–24]                                                                 |
| Average effective immune proportion (EIP) weighted by population size of children under 5 years old | 91.9%                      | Estimated from the population data (WorldPop) and vaccine coverage data |
| Basic reproduction number, $R_0$                                                                    | 14                         | Assumed                                                                 |
| Effective reproduction number at time 0 at a national level, $R_e(0)$                               | 1.13                       | Estimated                                                               |
| Latent period, $\gamma_1$                                                                           | 1/4 days <sup>-1</sup>     | [25]                                                                    |
| Infectious period, $\gamma_2$                                                                       | 1/15.02 days <sup>-1</sup> | Estimated [12]                                                          |
| Transmission rate, $\beta$                                                                          | 0.93                       | Estimated by $R_0 \gamma_2$                                             |
| Travelling rates, $\alpha$                                                                          | 0.05                       | Assumed                                                                 |
| Age criteria for population                                                                         | Less than 5 years old      | Assumed                                                                 |
| Birth and removal rate, $\mu$                                                                       | 1/(365*5)                  | Assumed                                                                 |
| Transition rate of the incubation period for 6 compartments, $\sigma$                               | 1/3.04 days <sup>-1</sup>  | Estimated [5,13,14]                                                     |
| Patch-level ES population coverage, $p_c$                                                           | 0.25                       | Assumed                                                                 |
| Paralysis-to-infection ratio, $p_{AFP}$                                                             | 1/200                      | [26]                                                                    |
| Probability of seeking healthcare, $P_H$                                                            | 0.9                        | Assumed                                                                 |
| Probability of stool sampling when a patient visits a hospital, $P_{AFP, sample}$                   | 0.53                       | [18,27]                                                                 |
| Sensitivity of poliovirus detection when stool is tested, $P_{AFP, test}$                           | 0.97                       | [19,28]                                                                 |

|                                                                                |                                      |                |
|--------------------------------------------------------------------------------|--------------------------------------|----------------|
| Sensitivity of poliovirus testing of samples from sewage water, $P_{ES, test}$ | 0.97                                 | [19,28]        |
| ES sensitivity                                                                 | LogNormal( $\mu=0.82, \sigma=1.45$ ) | Estimated [16] |
| Sampling frequency                                                             | Every 30 days                        | [20,21]        |

## 1.4 Outcome measures

The detection pattern for each simulation falls into one of the following five patterns (Fig 1).

1. No detection: neither AFP surveillance nor ES detected the poliovirus circulation.
2. AFP surveillance only detected polio patients.
3. AFP surveillance detected the poliovirus circulation earlier than ES.
4. ES detected the poliovirus circulation earlier than AFP surveillance.
5. ES only detected the poliovirus circulation.

Let  $t_{AFP}$  and  $t_{ES}$  be the timing of the first detection through AFP surveillance and ES, respectively. The lead time of the first detection through ES over APF surveillance (denoted as  $LT$ ) is defined as  $t_{AFP} - t_{ES}$ , meaning that a positive value of  $LT$  corresponds to the early detection by ES (pattern 4) and a negative value of  $LT$  corresponds to the early detection by AFP surveillance (pattern 3). The lead time can only be calculated for patterns 3 and 4.

We used the proportion of each detection pattern among simulations with any poliovirus detection as the main outcome and excluded no detection pattern to match simulation outcomes with the real-world observations. To inform the quantitative aspect of early detection, we further classified pattern 3 into “< -60 LT” and “-60 ~ -1 LT” categories and pattern 4 into “0 – 59 LT”, and “≥60 LT” categories. We refer to the “simulated early detection probability” as the proportion of “0 – 59 LT”, “≥60 LT” and ES only detection patterns given the poliovirus circulation is detected.

## 1.5 Average minimum distance to ES-covered patches and simulated early detection probability.

We quantified the simulated early detection probability varying the number and location of the ES. However, our stochastic simulation took a long time and implementation was complex. We therefore explored a simple alternative measurement to inform the ES site layout strategy. Given importation risk distribution and EIPs in each patch were known, we calculated the weighted average minimum distance to the closest ES-covered patch and quantified the relationship between this measure and the simulated early detection probability.

The average minimum distance to the closest ES-covered patches ( $d_{ave}$ ) weighted by the importation risks is given as

$$d_{ave} = \sum_i r_i \min(\{d_{ij}; j \in S_{ES}\}), \quad (S10)$$

where  $r_i$  is the importation risk at patch  $i$  for each scenario,  $d_{ij}$  is the distance between patch  $i$  and patch  $j$ , and  $S_{ES}$  is the set of patches with the ES.

Since the regional heterogeneity in vaccination coverage can influence the timing of detection, we also consider the average minimum distance weighted by the importation risks and the outbreak probability in each patch ( $d_{ave,w}$ ):

$$d_{ave,w} = \frac{\sum_i r_i P(X \geq 10; R_{e,i}) \min(\{d_{ij}; j \in S_{ES}\})}{\sum_i r_i P(X \geq 10; R_{e,i})}, \quad (S11)$$

where  $P(X \geq 10; R_{e,i})$  denotes the outbreak probability of 10 or more infections occurring given the effective reproduction number at patch  $i$  at the beginning of the simulation ( $R_{e,i}$ ), which is given by the product of the effective immunisation proportion at patch  $i$  (EIP <sub>$i$</sub> ) and the basic reproduction number ( $R_0$ ). We visualised the relationship between  $d_{ave,w}$  and the simulated early detection ability in the main analysis (Fig 5). We arbitrarily chose the value of 10 infections for the cutoff. Assuming the branching process and the Poisson distribution as the offspring distribution (i.e. no overdispersion), the probability of observing  $x$  cases given  $R_{e,i}$  follows the Borel-Tanner distribution [29–31].

$$P(X = x; R_{e,i}) = \frac{x^{x-2} R_{e,i}^{x-1} e^{-x R_{e,i}}}{(x-1)!}. \quad (S12)$$

Then, the probability of 10 or more infections occurring is calculated by considering the complement of less than 10 infections occurring.

$$P(X \geq 10; R_{e,i}) = 1 - \sum_{i=1}^9 P(X = i; R_{e,i}). \quad (S13)$$

The histogram of  $R_{e,i}$  in South Africa and the corresponding probability of at least 10 infections happening given a single introduction is shown in Fig S9.

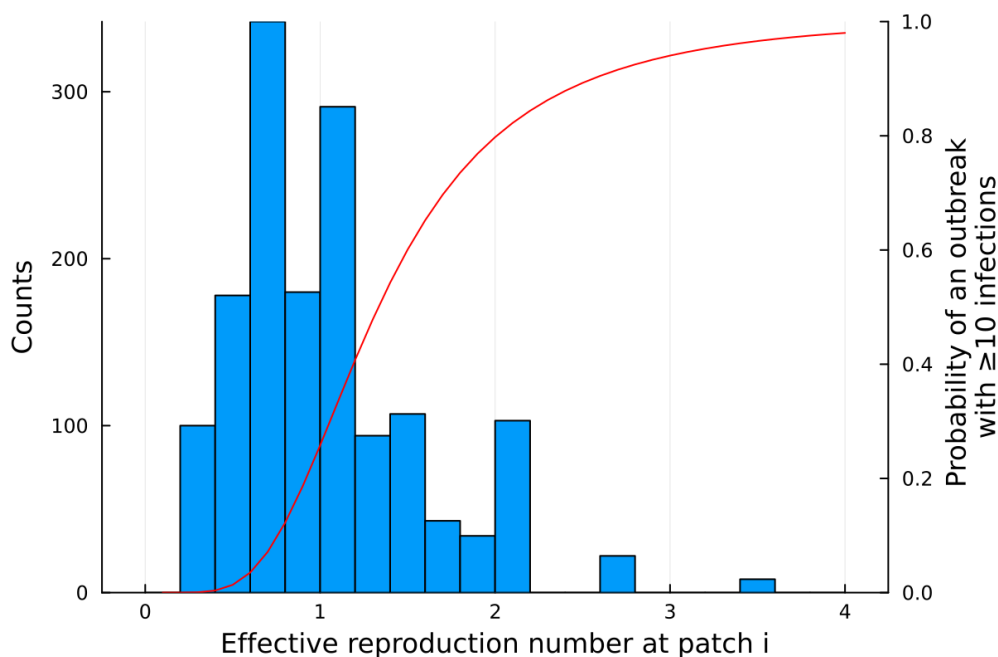

**Fig S9. Histogram of the effective reproduction number for each patch and corresponding outbreak probability with  $\geq 10$  infections.**

## 1.6 Simulation implementation.

We randomly chose a patch for an introduction of WPV1 and simulated the stochastic meta-population model for 3 years 10,000 times for each scenario. We recorded the number of individuals

at each patch in every compartment every day. Using those numbers in each compartment, we repeatedly applied the detection process through AFP surveillance and ES, varying the number of ES sites. We ended the simulation when one of the following criteria was met: the first poliovirus was detected through both surveillance, no polio patients were present, or three years had passed from the beginning of the simulation.

All the analysis was performed in Julia v1.8.3. It took around 5 to 8 hours to complete 10,000 simulations for one scenario from running the transmission model to running AFP surveillance model and ES model. The data and code are deposited on GitHub ([https://github.com/toshiakiasakura/polio\\_environmental\\_surveillance](https://github.com/toshiakiasakura/polio_environmental_surveillance)).

## 2 Supplementary results

### 2.1 Characteristics for the top 20 populous patches

**Table S6. Population size and effective immunisation proportion (EIP) for the top 20 populous patches.**

| Longitude | Latitude | District of each patch         | Population size aged under 5 years old | Cumulative proportion (%) | EIP <sup>d</sup> | Unimmunised population aged under 5 years old |
|-----------|----------|--------------------------------|----------------------------------------|---------------------------|------------------|-----------------------------------------------|
| 27.77     | -26.15   | West Rand                      | 88395                                  | 3.1                       | 94.9             | 4508                                          |
| 18.57     | -33.82   | City of Cape Town              | 66488                                  | 5.5                       | 94.7             | 3516                                          |
| 30.83     | -29.79   | eThekwinia                     | 55556                                  | 7.4                       | 90.3             | 5408                                          |
| 28.15     | -25.96   | City of Johannesburg           | 51209                                  | 9.2                       | 93.4             | 3369                                          |
| 27.96     | -26.15   | City of Johannesburg           | 48254                                  | 10.9                      | 93.4             | 3175                                          |
| 30.83     | -29.60   | iLembe                         | 46696                                  | 12.6                      | 75.4             | 11483                                         |
| 18.57     | -34.01   | City of Cape Town <sup>b</sup> | 40666                                  | 14.0                      | 94.7             | 2151                                          |
| 18.37     | -33.82   | City of Cape Town              | 40057                                  | 15.4                      | 94.7             | 2118                                          |
| 27.96     | -25.96   | City of Johannesburg           | 37234                                  | 16.7                      | 93.4             | 2450                                          |
| 27.96     | -25.39   | City of Tshwane                | 35821                                  | 18.0                      | 94.5             | 1983                                          |
| 28.15     | -26.15   | Ekurhuleni <sup>c</sup>        | 35621                                  | 19.3                      | 94.1             | 2110                                          |
| 25.47     | -33.82   | Nelson Mandela Bay             | 34878                                  | 20.5                      | 91.5             | 2962                                          |
| 27.77     | -26.34   | West Rand                      | 27991                                  | 21.5                      | 94.9             | 1427                                          |
| 27.96     | -25.77   | City of Tshwane                | 25726                                  | 22.4                      | 94.5             | 1424                                          |
| 28.15     | -25.58   | City of Tshwane                | 25023                                  | 23.3                      | 94.5             | 1385                                          |
| 27.77     | -26.54   | Sedibeng                       | 24300                                  | 24.1                      | 91.9             | 1965                                          |
| 27.77     | -25.96   | West Rand                      | 20628                                  | 24.9                      | 94.9             | 1052                                          |
| 28.34     | -25.58   | City of Tshwane                | 19920                                  | 25.6                      | 94.5             | 1103                                          |
| 28.34     | -26.15   | Ekurhuleni                     | 19597                                  | 26.3                      | 94.1             | 1161                                          |
| 18.37     | -34.01   | City of Cape Town              | 17993                                  | 26.9                      | 94.7             | 952                                           |

<sup>a</sup> Closest patch to King Shaka International Airport among the patches in this table. The rank of population size in King Shaka International Airport's patch is 61<sup>st</sup>.

<sup>b</sup> Cape Town International Airport is in this patch.

<sup>c</sup> Tambo International is in this patch.

<sup>d</sup> Effective immunisation proportion.

## 2.2 Simulation results under a single patch setting.

We simulated a stochastic SEIR model in a single patch to differentiate between the effects of parameters on the simulated early detection ability of ES attributable to spatial components and those stemming from model behaviours in a single patch. We employed the same model without a meta-population framework using the parameters listed in Table S5. We chose 100,000 population size of children aged under 5 years old and set the population size of all ages as 100,000 divided by the patch-level ES population coverage ( $p_c$ ).

We visualised the simulated cumulative detection probability over time for the AFP surveillance (dotted lines) and ES (solid lines) in Fig S10. Additionally, we visualised the proportion of any detection of the poliovirus circulation among all simulations including no detection pattern, and the proportion of each detection pattern given poliovirus circulation is detected (excluding no detection pattern).

Theoretically, ES-related parameters (sampling frequency, ES sensitivity, patch-level ES population coverage) do not influence the simulated cumulative probability of detection for AFP surveillance, which was confirmed by our simulations. Regarding population size, as the population size of children under 5 years old increased, the simulated cumulative probability for AFP surveillance also increased since the absolute value of patients with poliovirus became larger. On the other hand, the simulated cumulative probability for ES decreased because we assumed ES sensitivity was dependent on the incidence rate and a larger denominator resulted in the lower incidence rate.

We re-estimated ES sensitivity parameters with the simulated first detection timing through ES using Equation S5 to validate our assumption that ES sensitivity is proportional to the incidence rate of infectious individuals (Fig S11). We did not include simulated negative environmental samples for the estimation. Through this procedure, we illustrated higher ES sensitivity estimates for a large population size and lower ES sensitivity estimates for a small population size. This model behaviour is consistent with other estimates using the wastewater sample data [32].

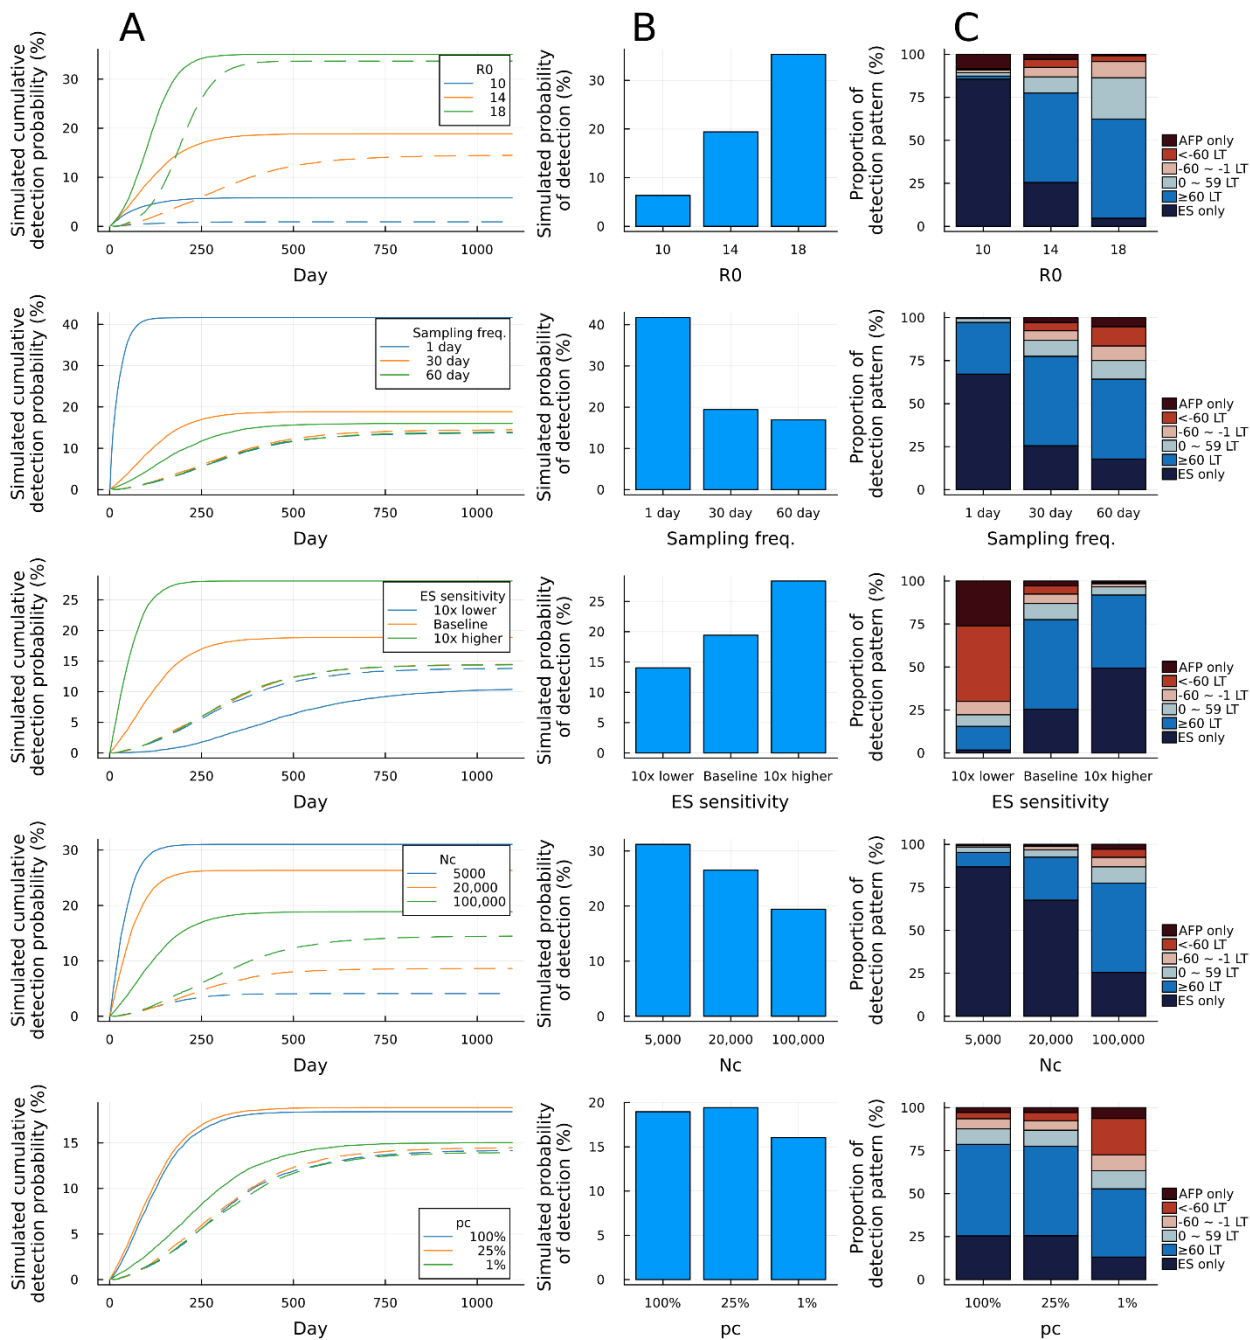

**Fig S10. Sensitivity analysis of parameters in a single patch setting.** (A) Simulated cumulative detection probabilities. Solid lines and dotted lines represent simulated probability for ES and AFP surveillance, respectively. (B) Simulated probability of detection through either AFP surveillance or ES among all simulations including no detection pattern (%). (C) The proportion of each detection pattern (%) given poliovirus circulation was detected.

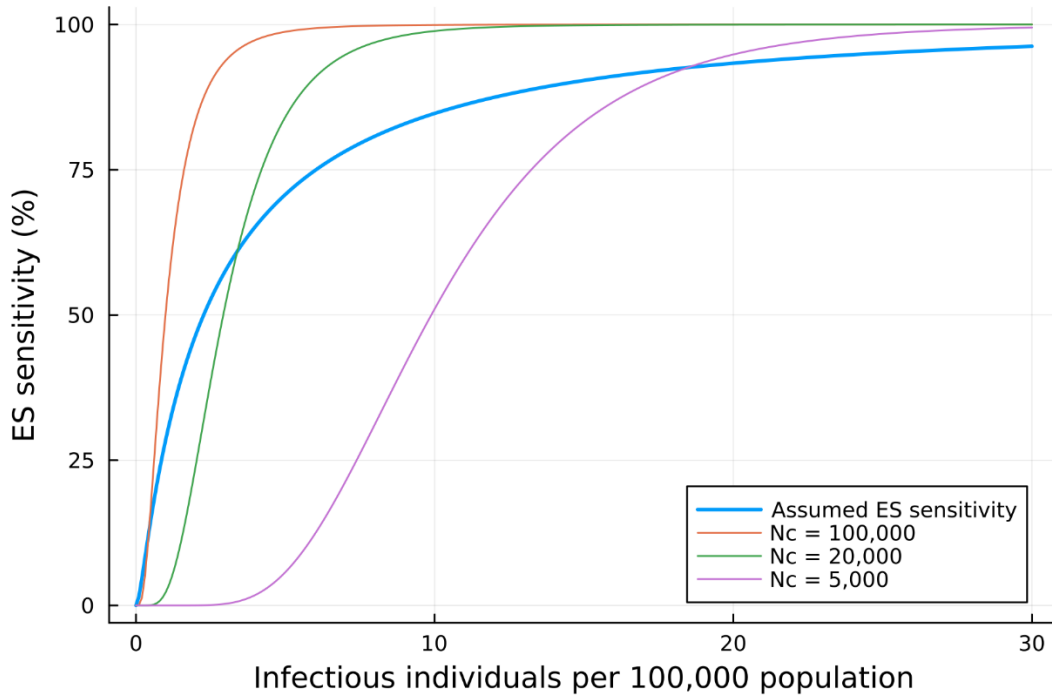

**Fig S11. Dose-response curves for estimated ES sensitivity parameters under different population sizes of children under 5 years old ( $N_c$ ) in a single patch setting.**

### 2.3 Two alternative visualisations for the main analysis

We limited the x-axis for Fig 2 to 160 for the interpretability of the results, and here we visualised the same results where the x-axis represents the national ES population coverage (Fig S12). The national ES population coverage was obtained by the product of the percentage of the population in ES-covered patches and the patch-level ES population coverage ( $p_c$ ). Therefore, the maximum value of the ES population coverage is matched with our parameter choice for  $p_c$  (i.e. 25%). It is noted that the maximum number of ES-covered patches of 1502 corresponds to the national ES population coverage of 25%, and 160 ES-covered patches were close to the plateau of the simulated early detection probability.

We further calculated the proportion of each detection pattern by including the “no detection” pattern (Fig S13) whereas we did not include the “no detection” pattern in the main text figures. Differences in the proportion of the “no detection” pattern would be attributable to the ES layout strategy and heterogeneity in the effective reproduction number in each path (Fig S9).



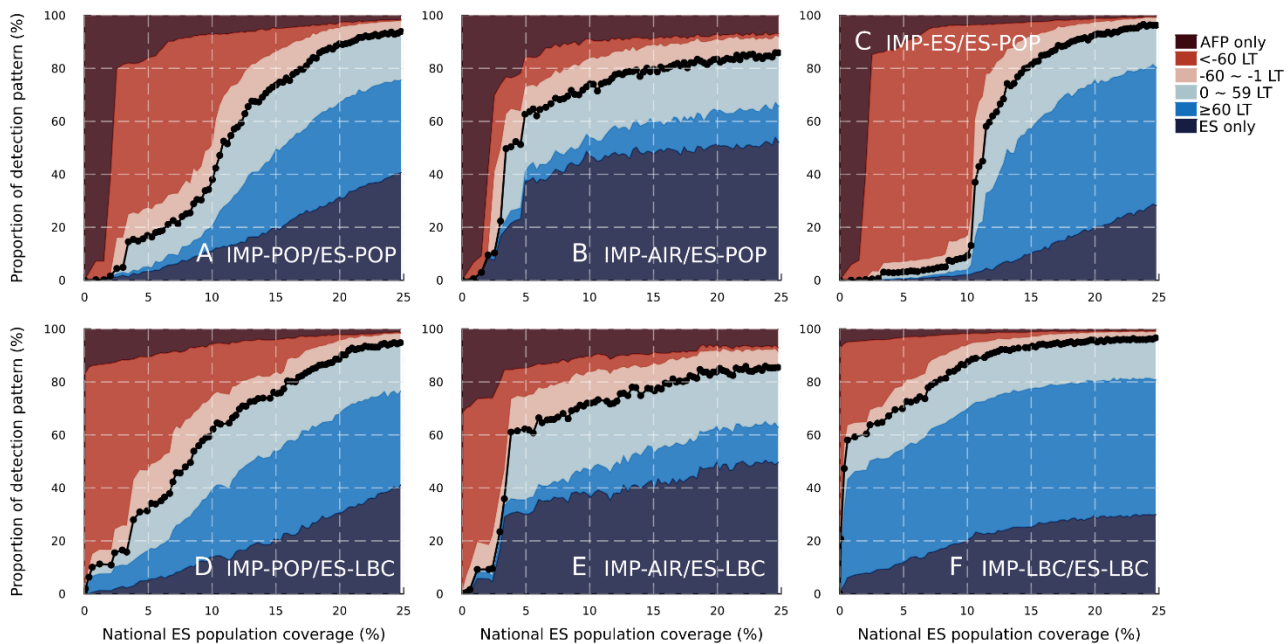

**Fig S12. Proportion of each detection pattern (%) against national ES population coverage for 6 scenarios.** The blue-coloured area under the black dotted lines represents the simulated early detection probability, consisting of early detection of ES over AFP surveillance and ES only detection. LT denotes the lead time of poliovirus detection through ES over AFP surveillance.

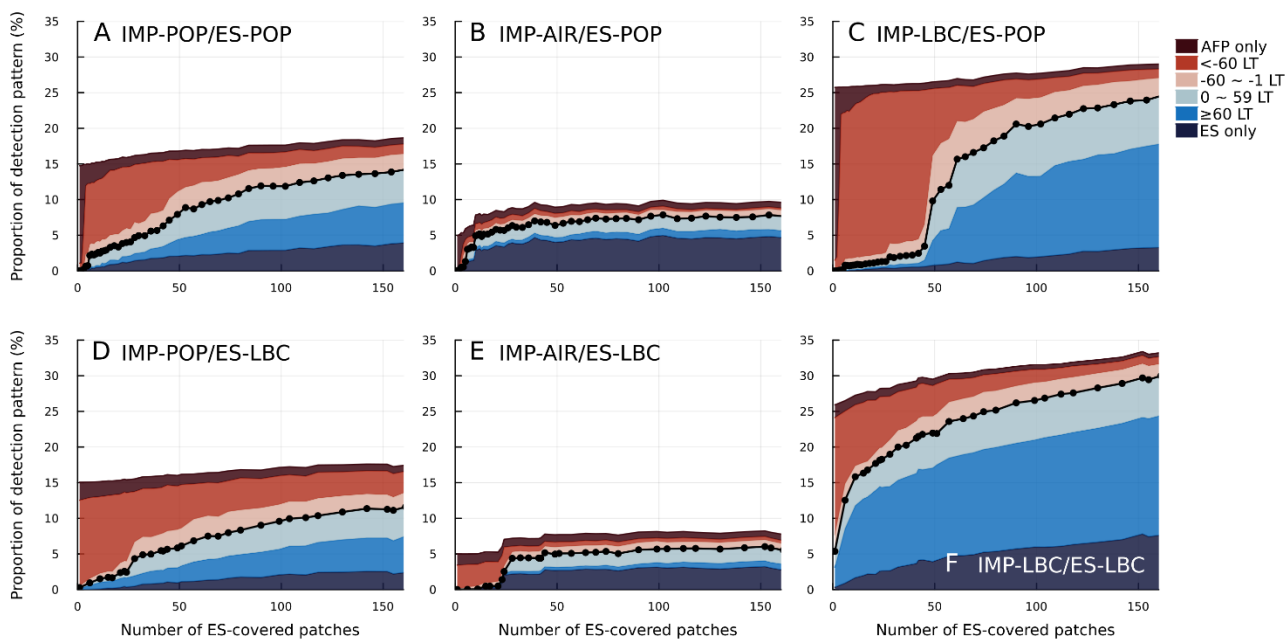

**Fig S13. Proportion of each detection pattern (%) including the no detection pattern against the number of ES-covered patches for 6 scenarios.** The non-coloured area represents the simulated probability of detecting poliovirus circulation neither through AFP surveillance nor ES. The blue-colours area under the black dotted lines represents the simulated early detection probability. LT denotes the lead time of poliovirus detection through ES over AFP surveillance.

## 2.4 Sensitivity analysis on the patch-level ES population coverage for different scenarios

We conducted the sensitivity analysis of the patch-level ES population coverage ( $p_c$ ) for the other 5 scenarios as well as the main text (Fig 4). We found a similar trend in Fig S14-S15 as in Fig 4. That is, the simulated early detection probability was robust against the number of ES-covered patches but had a large variation against the national ES population coverage.

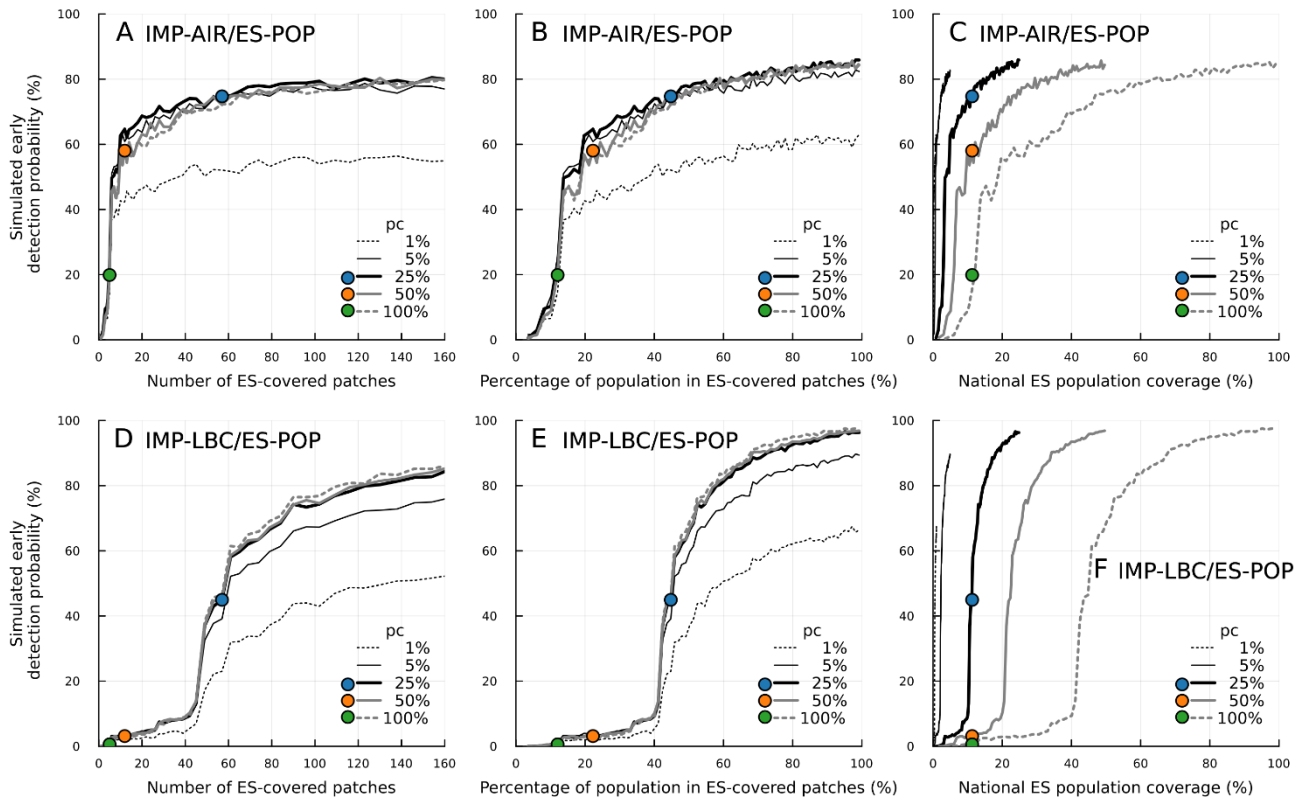

**Fig S14. Sensitivity analysis of the patch-level ES population coverage,  $p_c$ , for the ES-pop scenarios.** (A, B, C) For the IMP-AIR/ES-POP scenario. (C, D, F) For the IMP-LBC/ES-POP scenario. Simulated early detection probability is plotted (A, D) against the number of ES-covered patches, (B, E) against the percentage of the population in ES-covered patches, and (C, F) against the national ES population coverage. The data points represent simulations where the national ES population coverage of the simulated ES layout aligns with the current coverage in South Africa (11.3%), under  $p_c$  of 25% (blue), 50% (orange) and 100% (orange). The national ES population coverage is given by the product of  $p_c$  and the percentage of the population in ES-coverage patches. It is noted that the maximum number of ES-covered patches is 1502 and the x-axis for (A, D) is limited to a maximum value of 160.

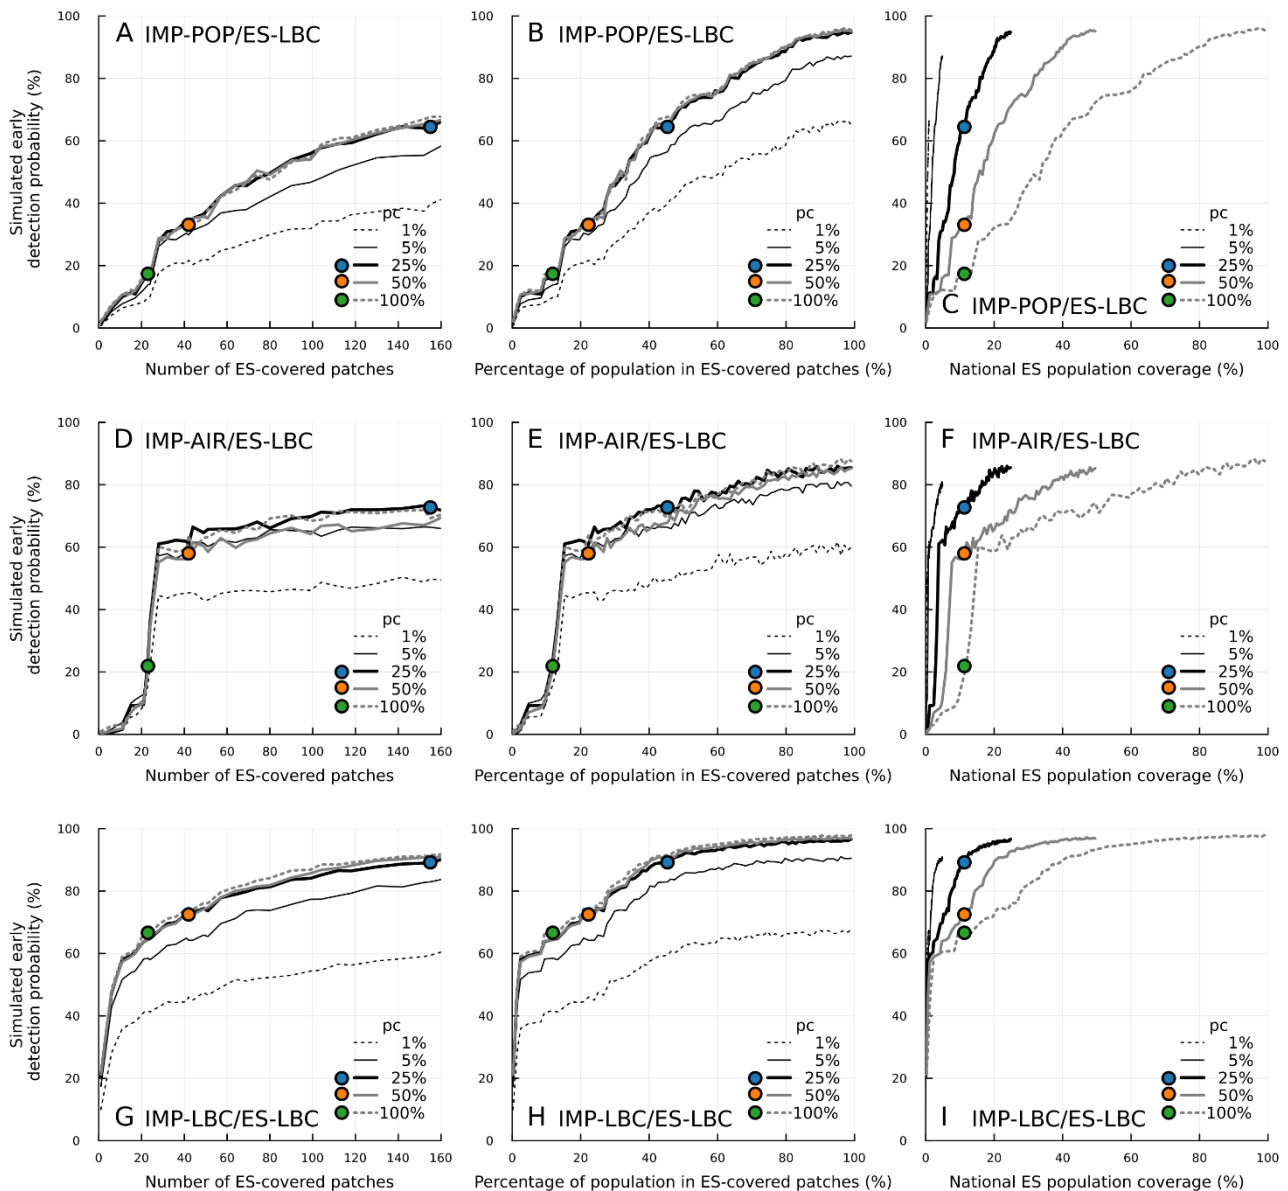

**Fig S15. Sensitivity analysis of the patch-level ES population coverage,  $p_c$ , for the ES-LBC scenarios.** (A, B, C) For the IMP-POP/ES-LBC scenario. (D, E, F) For the IMP-AIR/ES-LBC scenario. (G, H, I) For the IMP-LBC/ES-LBC scenario. Simulated early detection probability is plotted (A, D, G) against the number of ES-covered patches, (B, E, H) against the percentage of the population in ES-covered patches, and (C, F, I) against the national ES population coverage. The data points represent simulations where the national ES population coverage of the simulated ES layout aligns with the current coverage in South Africa (11.3%), under  $p_c$  of 25% (blue), 50% (orange) and 100% (orange). The national ES population coverage is given by the product of  $p_c$  and the percentage of the population in ES-coverage patches. It is noted that the maximum number of ES-covered patches is 1502 and the x-axis for (A, D, G) is limited to a maximum value of 160.

### 3 References

1. Tatem AJ. WorldPop, open data for spatial demography. *Sci Data*. 2017 Jan 31;4(1):170004.
2. Republic of South Africa Expanded Programme on Immunisation (EIP) national coverage survey report 2020 [Internet]. Department of Health, Pretoria, South Africa; Available from: [https://www.health.gov.za/wp-content/uploads/2022/03/National-EPI-Coverage-Survey\\_Final-full-report-Dec-2020.pdf](https://www.health.gov.za/wp-content/uploads/2022/03/National-EPI-Coverage-Survey_Final-full-report-Dec-2020.pdf)
3. Ranta J, Hovi T, Arjas E. Poliovirus surveillance by examining sewage water specimens: Studies on detection probability using simulation models. *Risk Anal*. 2001 Dec;21(6):1087–96.
4. Brouwer AF, Eisenberg JNS, Pomeroy CD, Shulman LM, Hindiyeh M, Manor Y, et al. Epidemiology of the silent polio outbreak in Rahat, Israel, based on modeling of environmental surveillance data. *Proc Natl Acad Sci USA* [Internet]. 2018 Nov 6 [cited 2024 Aug 14];115(45). Available from: <https://pnas.org/doi/full/10.1073/pnas.1808798115>
5. Molodecky NA, Jafari H, Safdar RM, Ahmed JA, Mahamud A, Bandyopadhyay AS, et al. Modelling the spread of serotype-2 vaccine derived-poliovirus outbreak in Pakistan and Afghanistan to inform outbreak control strategies in the context of the COVID-19 pandemic. *Vaccine*. 2023 Apr;41:A93–104.
6. Wagner BG, Behrend MR, Klein DJ, Upfill-Brown AM, Eckhoff PA, Hu H. Quantifying the impact of expanded age group campaigns for polio eradication. Bauch CT, editor. *PLoS ONE*. 2014 Dec 1;9(12):e113538.
7. Post WM, DeAngelis DL, Travis CC. Endemic disease in environments with spatially heterogeneous host populations. *Math Biosci*. 1983 Apr;63(2):289–302.
8. Hagenaars TJ, Donnelly CA, Ferguson NM. Spatial heterogeneity and the persistence of infectious diseases. *J Theor Biol*. 2004 Aug;229(3):349–59.
9. Molodecky NA, Blake IM, O'Reilly KM, Wadood MZ, Safdar RM, Wesolowski A, et al. Risk factors and short-term projections for serotype-1 poliomyelitis incidence in Pakistan: A spatiotemporal analysis. Viboud C, editor. *PLoS Med*. 2017 Jun 12;14(6):e1002323.
10. Voorman A, O'Reilly K, Lyons H, Goel AK, Touray K, Okiror S. Real-time prediction model of cVDPV2 outbreaks to aid outbreak response vaccination strategies. *Vaccine*. 2023 Apr;41:A105–12.
11. Mangal TD, Aylward RB, Shuaib F, Mwanza M, Pate MA, Abanida E, et al. Spatial dynamics and high risk transmission pathways of poliovirus in Nigeria 2001-2013. Codeço CT, editor. *PLoS ONE*. 2016 Sep 26;11(9):e0163065.
12. Tebbens RJD, Pallansch MA, Chumakov KM, Halsey NA, Hovi T, Minor PD, et al. Review and assessment of poliovirus immunity and transmission: Synthesis of knowledge gaps and identification of research needs. *Risk Anal*. 2013 Apr;33(4):606–46.
13. Grassly NC, Fraser C, Wenger J, Deshpande JM, Sutter RW, Heymann DL, et al. New strategies for the elimination of polio from India. *Science*. 2006 Nov 17;314(5802):1150–3.
14. Casey AE. The incubation period in epidemic poliomyelitis. *JAMA*. 1942 Nov 14;120(11):805.

15. Liu AB, Lee D, Jalihal AP, Hanage WP, Springer M. Quantitatively assessing early detection strategies for mitigating COVID-19 and future pandemics. *Nat Commun.* 2023 Dec 20;14(1):8479.
16. Wu F, Xiao A, Zhang J, Moniz K, Endo N, Armas F, et al. Wastewater surveillance of SARS-CoV-2 across 40 U.S. states from February to June 2020. *Water Research.* 2021 Sep;202:117400.
17. Fine PEM, Carneiro IAM. Transmissibility and persistence of oral polio vaccine viruses: Implications for the global poliomyelitis eradication initiative. *Am J Epidemiol.* 1999 Nov 15;150(10):1001–21.
18. Howard W, Moonsamy S, Seakamela L, Jallow S, Modiko F, du Plessis H, et al. Sensitivity of the acute flaccid paralysis surveillance system for poliovirus in South Africa, 2016–2019. *J Med Microbiol.* 2021 Oct 21;70(10):001441.
19. Gerloff N, Sun H, Mandelbaum M, Maher C, Nix WA, Zaidi S, et al. Diagnostic Assay Development for Poliovirus Eradication. *J Clin Microbiol.* 2018 Feb;56(2):e01624-17.
20. Hamisu AW, Blake IM, Sume G, Braka F, Jimoh A, Dahiru H, et al. Characterizing environmental surveillance sites in Nigeria and their sensitivity to detect poliovirus and other enteroviruses. *J Infect Dis.* 2022 Apr 19;225(8):1377–86.
21. Global polio eradication initiative. Guidelines on environmental surveillance for detection of polioviruses [Internet]. 2023. Available from: [https://polioeradication.org/wp-content/uploads/2016/07/GPLN\\_GuidelinesES\\_April2015.pdf](https://polioeradication.org/wp-content/uploads/2016/07/GPLN_GuidelinesES_April2015.pdf)
22. Duintjer Tebbens RJ, Pallansch MA, Cochi SL, Ehrhardt DT, Farag NH, Hadler SC, et al. Modeling poliovirus transmission in Pakistan and Afghanistan to inform vaccination strategies in undervaccinated subpopulations. *Risk Anal.* 2018 Aug;38(8):1701–17.
23. Thompson KM, Pallansch MA, Duintjer Tebbens RJ, Wassilak SG, Kim JH, Cochi SL. Preeradication vaccine policy options for poliovirus infection and disease control. *Risk Anal.* 2013 Apr;33(4):516–43.
24. Grassly NC. Immunogenicity and effectiveness of routine immunization with 1 or 2 doses of inactivated poliovirus vaccine: Systematic review and meta-analysis. *J Infect Dis.* 2014 Nov 1;210(Suppl 1):S439–46.
25. Debré R, Duncan D, Enders JF, Freyche MJ, Gard S, Gear J, et al. Poliomyelitis [Internet]. World Health Organization; 1955 [cited 2023 Aug 6]. Available from: <https://apps.who.int/iris/handle/10665/41659>
26. Nathanson N, Kew OM. From emergence to eradication: The epidemiology of poliomyelitis deconstructed. *Am J Epidemiol.* 2010 Dec 1;172(11):1213–29.
27. Tesfaye B, Sowe A, Kisangau N, Ogange J, Ntoburi S, Nekar I, et al. An epidemiological analysis of acute flaccid paralysis (AFP) surveillance in Kenya, 2016 to 2018. *BMC Infect Dis.* 2020 Aug 18;20(1):611.
28. O'Reilly KM, Grassly NC, Allen DJ, Bannister-Tyrrell M, Cameron A, Carrion Martin AI, et al. Surveillance optimisation to detect poliovirus in the pre-eradication era: a modelling study of England and Wales. *Epidemiol Infect.* 2020;148:e157.

29. Farrington CP. Branching process models for surveillance of infectious diseases controlled by mass vaccination. *Biostatistics*. 2003 Apr 1;4(2):279–95.
30. Nishiura H, Yan P, Sleeman CK, Mode CJ. Estimating the transmission potential of supercritical processes based on the final size distribution of minor outbreaks. *J Theor Biol*. 2012 Feb;294:48–55.
31. Blumberg S, Funk S, Pulliam JRC. Detecting differential transmissibilities that affect the size of self-limited outbreaks. Wilke CO, editor. *PLoS Pathog*. 2014 Oct 30;10(10):e1004452.
32. Li Q, Lee BE, Gao T, Qiu Y, Ellehoj E, Yu J, et al. Number of COVID-19 cases required in a population to detect SARS-CoV-2 RNA in wastewater in the province of Alberta, Canada: Sensitivity assessment. *J Environ Sci*. 2023 Mar;125:843–50.

## ES-POP

Natioanl ES population coverage: 0.9%

Number of ES-covered patches: 1

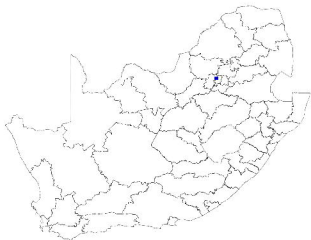



## ES-LBC

Natioanl ES population coverage: 0.1%

Number of ES-covered patches: 1

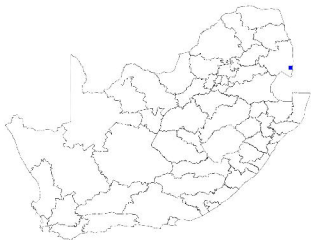

Source: https://medrxiv.org/content/10.1101/2024.08.17.24312151v1.full.pdf
